# Supplementary material for: New Napyradiomycin Analogues from Streptomyces sp. Strain CA-271078
Source: PubMed Central journal article supplement (PMC7024253; doi:10.3390/md18010022), 2019-12-26
Supplement: marinedrugs-18-00022-s001.pdf [file marinedrugs-18-00022-s001.pdf]

## Supplementary Materials

# New Napyradiomycin Analogues from *Streptomyces* sp. Strain CA-271078

Daniel Carretero-Molina <sup>1,2</sup>, Francisco Javier Ortiz-López <sup>1,\*</sup>, Jesús Martín <sup>1</sup>,  
Daniel Oves-Costales <sup>1</sup>, Caridad Díaz <sup>1</sup>, Mercedes de la Cruz <sup>1</sup>, Bastien Cautain <sup>1</sup>,  
Francisca Vicente <sup>1</sup>, Olga Genilloud <sup>1</sup> and Fernando Reyes <sup>1,\*</sup>

- <sup>1</sup> Fundación MEDINA, Centro de Excelencia en Investigación de Medicamentos Innovadores en Andalucía, Avda. del Conocimiento 34, 18016, Armilla (Granada), Spain; daniel.carretero@medinaandalucia.es (D.C.-M.); jesus.martin@medinaandalucia.es (J.M.); daniel.oves@medinaandalucia.es (D.O.-C.); caridad.diaz@medinaandalucia.es (C.D.); mercedes.delacruz@medinaandalucia.es (M.d.l.C.); bastien.cautain@medinaandalucia.es (B.C.); francisca.vicente@medinaandalucia.es (F.V.); olga.genilloud@medinaandalucia.es (O.G.)
- <sup>2</sup> Doctoral Programme in Pharmacy (B15.56.1), Doctoral School in Health Sciences, University of Granada, Spain.
- \* Correspondence: [javier.ortiz@medinaandalucia.es](mailto:javier.ortiz@medinaandalucia.es) (F.J.O.-L.); [fernando.reyes@medinaandalucia.es](mailto:fernando.reyes@medinaandalucia.es) (F.R.); Tel.: +34-958-993-965 (F.J.O.-L. and F.R.)

Received: 10 December 2019; Accepted: 25 December 2019; Published: date

## List of Supplementary Materials:

- Figure S1.** Electrospray-time of flight (ESI-TOF) (A) and UV (B) spectra for compound 1.
- Figure S2.** <sup>1</sup>H NMR spectrum (DMSO-*d*<sub>6</sub>, 500 MHz) of compound 1.
- Figure S3.** <sup>13</sup>C NMR spectrum (DMSO-*d*<sub>6</sub>, 125 MHz) of compound 1.
- Figure S4.** COSY spectrum of compound 1.
- Figure S5.** HSQC spectrum of compound 1.
- Figure S6.** HMBC spectrum of compound 1.
- Figure S7.** ROESY spectrum of compound 1.
- Figure S8.** Energy minimized molecular model of compound 1.
- Figure S9.** Electrospray-time of flight (ESI-TOF) (A) and UV (B) spectra for compound 2.
- Figure S10.** <sup>1</sup>H NMR spectrum (DMSO-*d*<sub>6</sub>, 500 MHz) of compound 2.
- Figure S11.** <sup>13</sup>C NMR spectrum (DMSO-*d*<sub>6</sub>, 125 MHz) of compound 2.
- Figure S12.** COSY spectrum of compound 2.
- Figure S13.** HSQC spectrum of compound 2.
- Figure S14.** HMBC spectrum of compound 2.
- Figure S15.** NOESY spectrum of compound 2.
- Figure S16.** ROESY spectrum of compound 2.
- Figure S17.** Energy minimized molecular model of compound 2.
- Figure S18.** Electrospray-time of flight (ESI-TOF) (A) and UV (B) spectra for compound 3.
- Figure S19.** <sup>1</sup>H NMR spectrum (DMSO-*d*<sub>6</sub>, 500 MHz) of compound 3.
- Figure S20.** <sup>13</sup>C NMR spectrum (DMSO-*d*<sub>6</sub>, 125 MHz) of compound 3.
- Figure S21.** COSY spectrum of compound 3.

**Figure S22.** HSQC spectrum of compound 3.

**Figure S23.** HMBC spectrum of compound 3.

**Figure S24.** NOESY spectrum of compound 3.

**Figure S25.** ROESY spectrum of compound 3.

**Figure S26.** Energy minimized molecular model of compound 3.

**Figure S27.** Electrospray-time of flight (ESI-TOF) (A) and UV (B) spectra for compound 4.

**Figure S28.**  $^1\text{H}$  NMR spectrum ( $\text{DMSO-}d_6$ , 500 MHz) of compound 4.

**Figure S29.**  $^{13}\text{C}$  NMR spectrum ( $\text{DMSO-}d_6$ , 125 MHz) of compound 4.

**Figure S30.** COSY spectrum of compound 4.

**Figure S31.** HSQC spectrum of compound 4.

**Figure S32.** HMBC spectrum of compound 4.

**Figure S33.** NOESY spectrum of compound 4.

**Figure S34.** Energy minimized molecular model of compound 4.

**Figure S35.** Electrospray-time of flight (ESI-TOF) (A) and UV (B) spectra for compound 5.

**Figure S36.**  $^1\text{H}$  NMR spectrum ( $\text{DMSO-}d_6$ , 500 MHz) of compound 5.

**Figure S37.**  $^{13}\text{C}$  NMR spectrum ( $\text{DMSO-}d_6$ , 125 MHz) of compound 5.

**Figure S38.** COSY spectrum of compound 5.

**Figure S39.** (A) HSQC spectrum of compound 5. (B) Key overlay HSQC correlations for compound 5 and 10 supporting the etherification of the 18-hydroxy group in 5.

**Figure S40.** (A) HMBC of compound 5. (B) Key HMBC correlation supporting the etherification of the 18-hydroxy group in 5.

**Figure S41.** NOESY spectrum of compound 5.

**Figure S42.** Overlay of different conformers for compound 5.

**Figure S43.** Napyradiomycin metabolites isolated from CA-271078 (1-15).

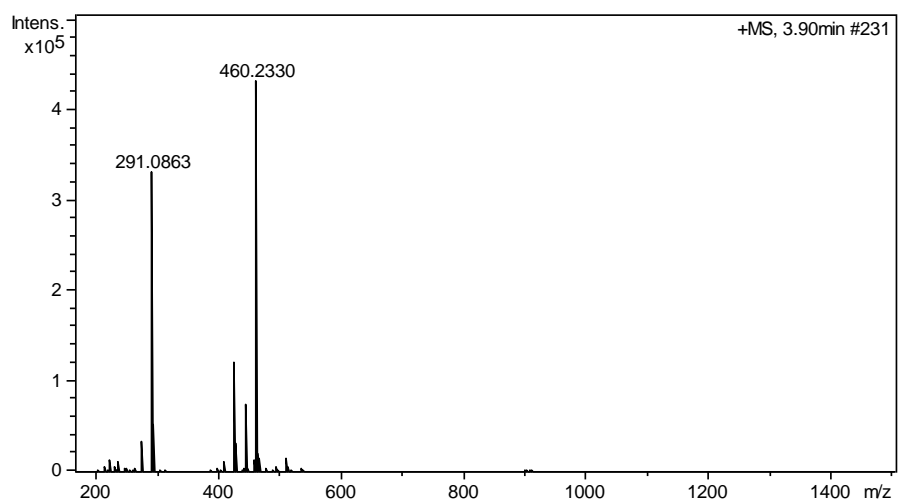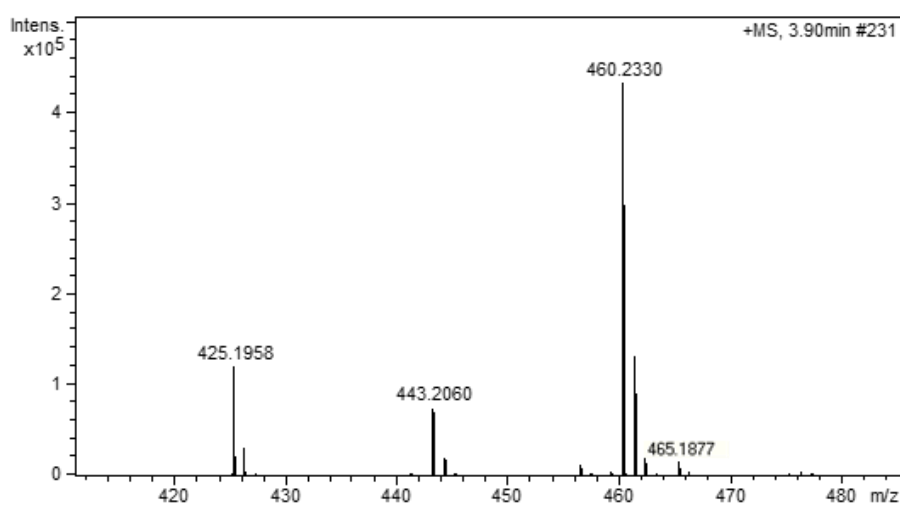

(A)

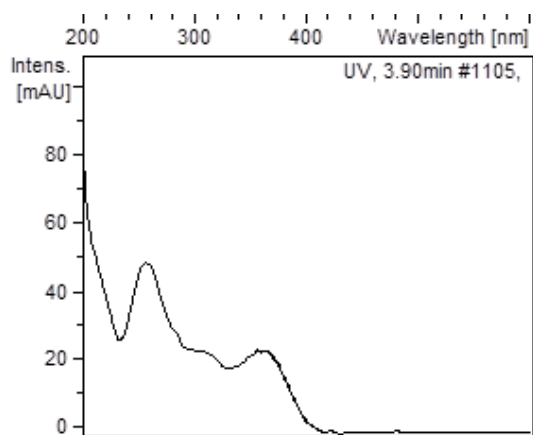

(B)

**Figure S1.** Electrospray-time of flight (ESI-TOF) (A) and UV (B) spectra of compound 1.

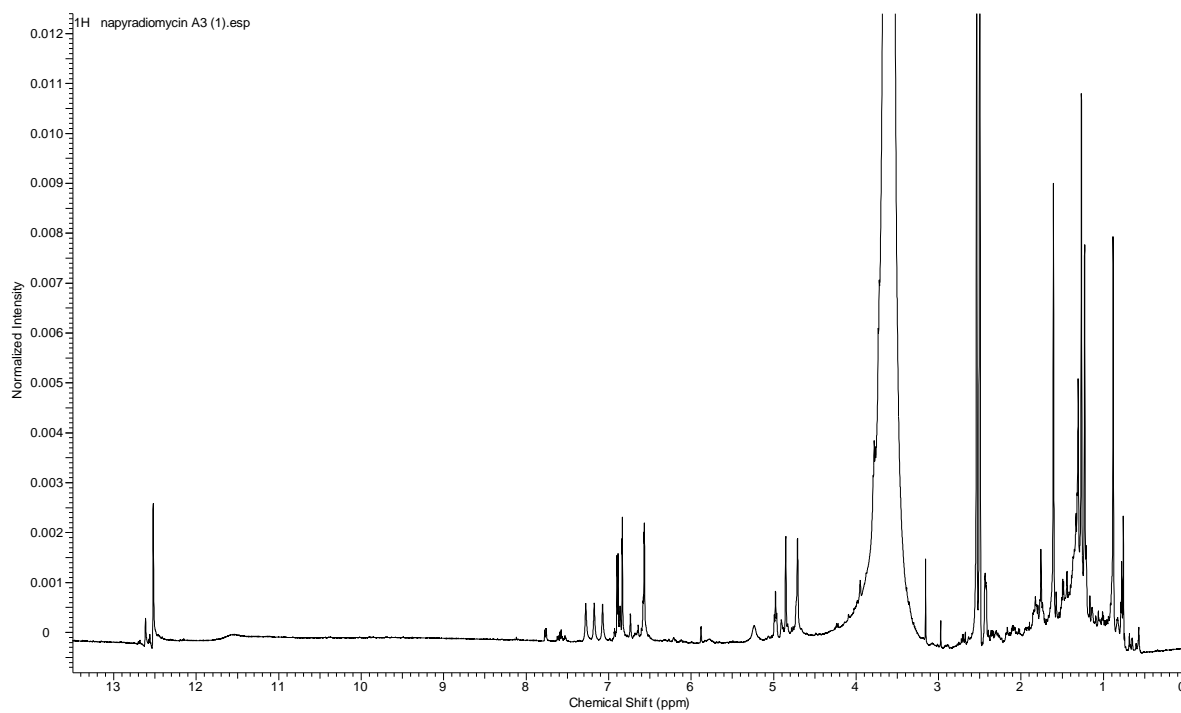

**Figure S2.** <sup>1</sup>H NMR (DMSO-d<sub>6</sub>, 500 MHz) of compound 1.

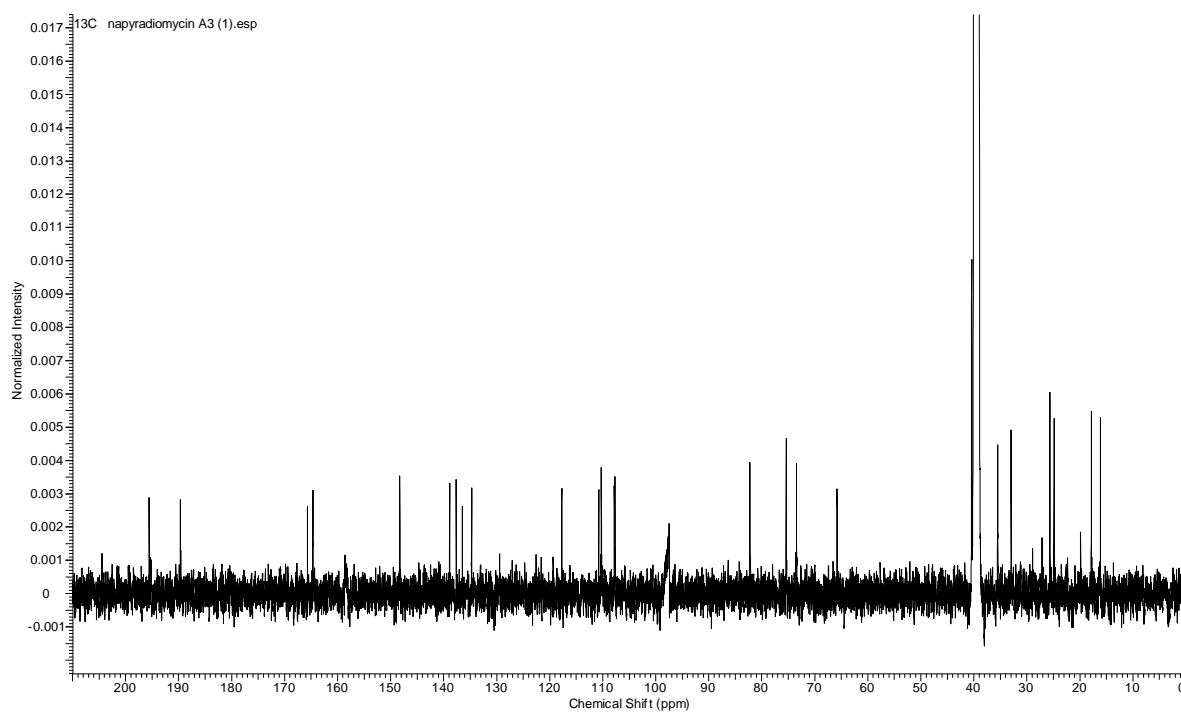

**Figure S3.** <sup>13</sup>C NMR (DMSO-d<sub>6</sub>, 500 MHz) of compound 1.

COSY napradiomycin A3 (1).esp

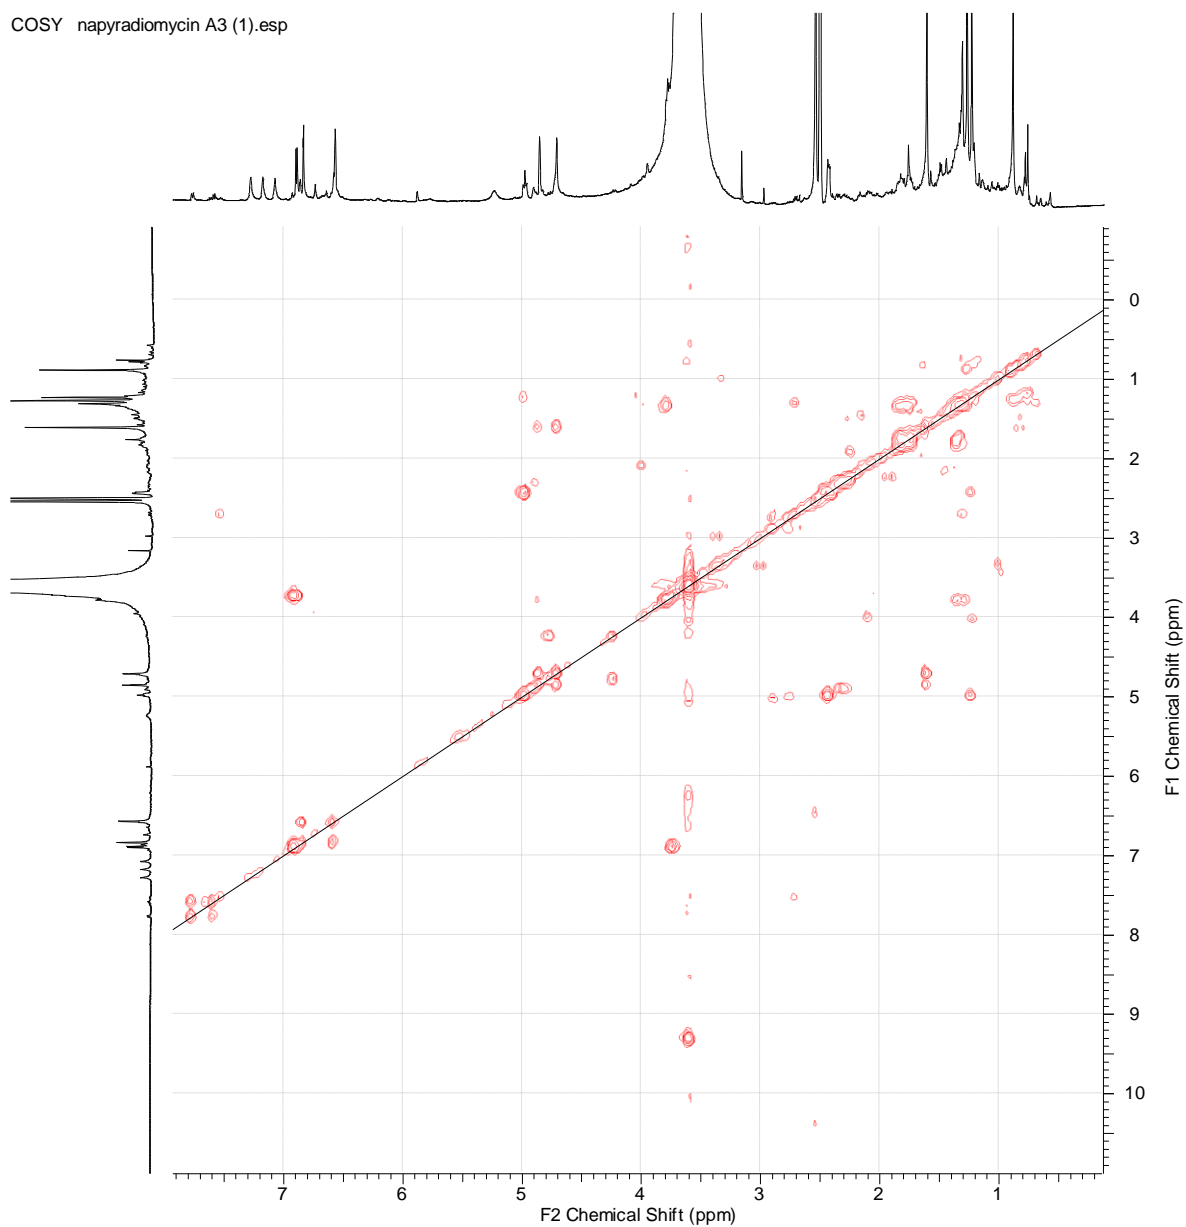

Figure S4. COSY of compound 1.

HSQC napyradiomycin A3 (1).esp

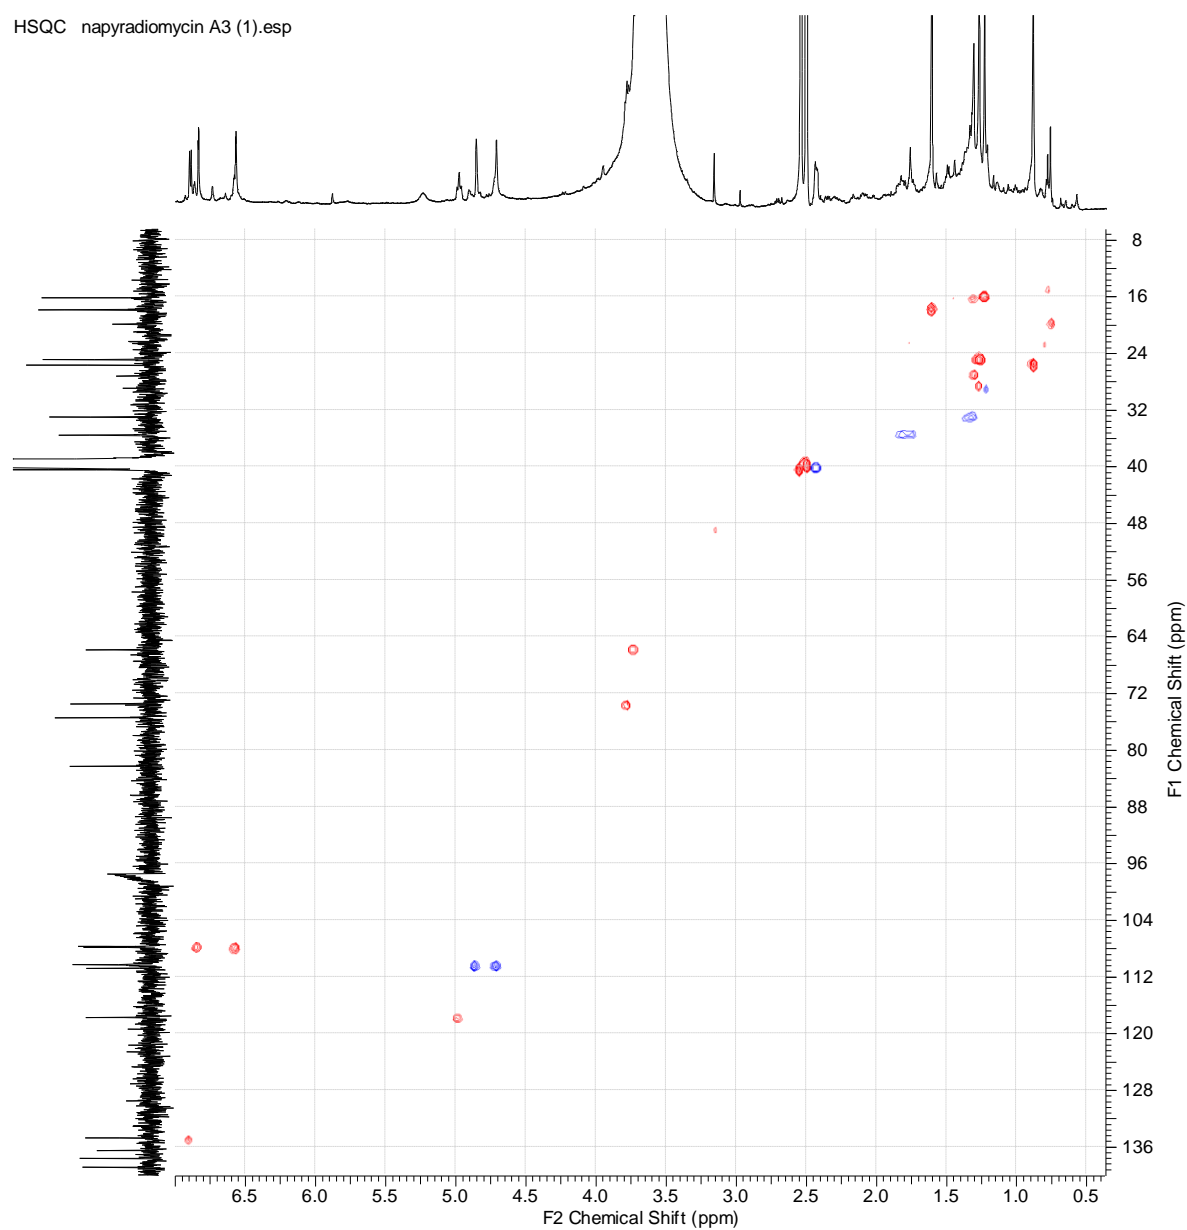**Figure S5.** HSQC spectrum of compound 1.

HMBC napyradiomycin A3 (1).esp

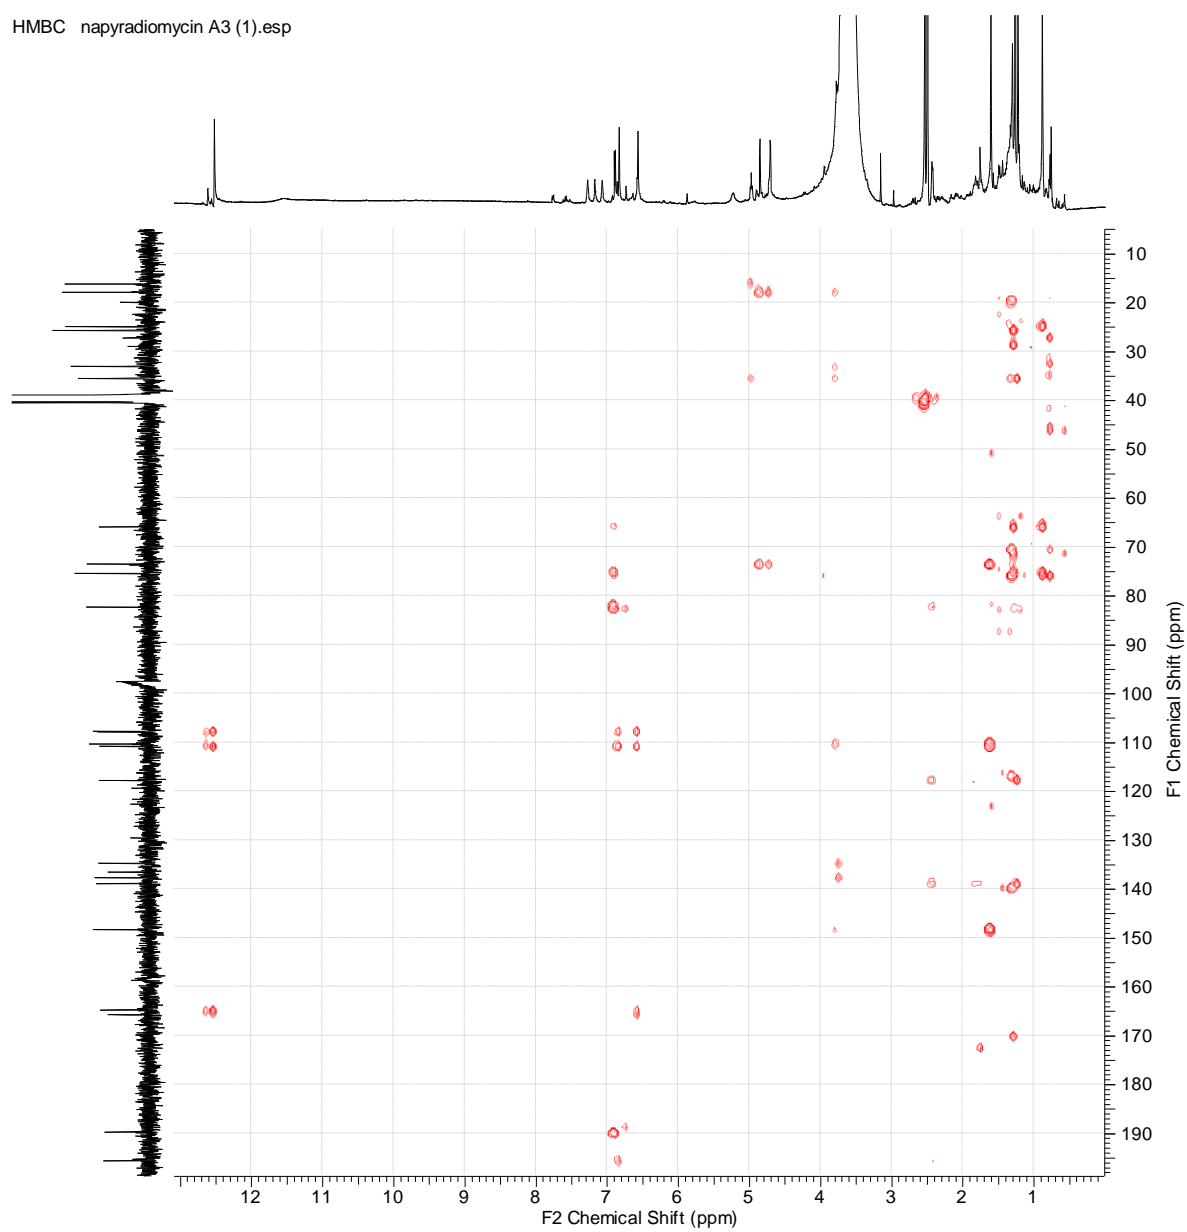

Figure S6. HMBC of compound 1.

ROESY napyradiomycin A3 (1).esp

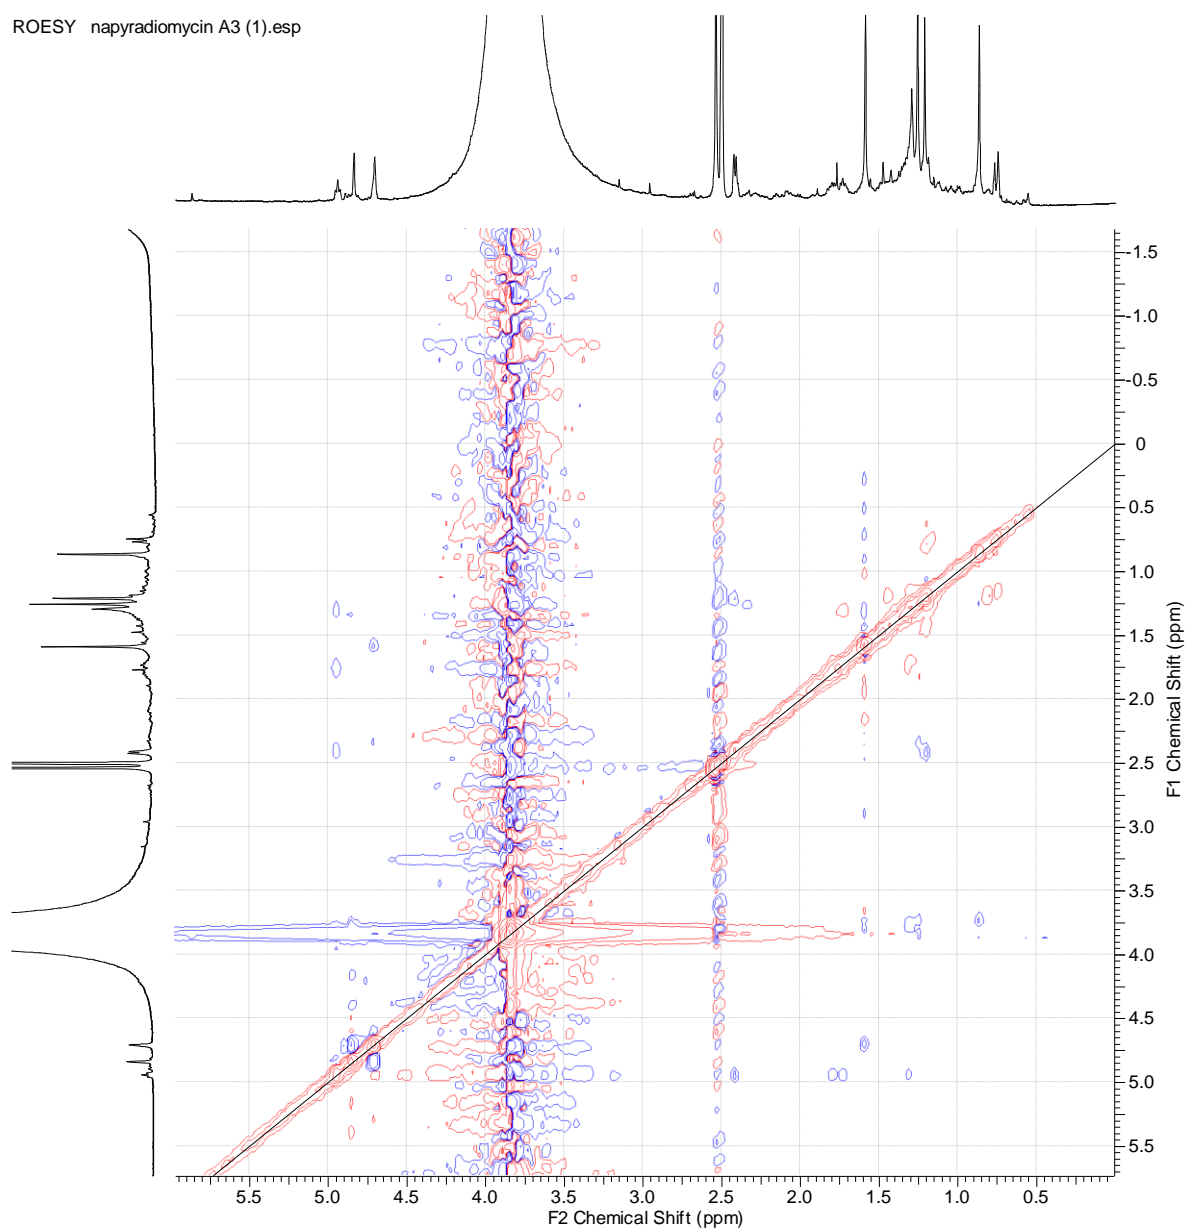

Figure S7. ROESY of compound 1



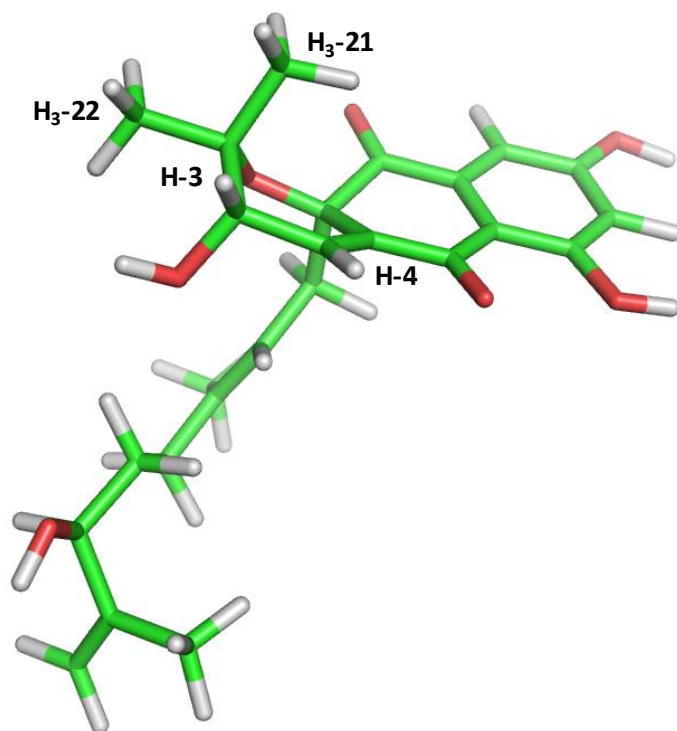

**Figure S8.** Energy minimized molecular model of compound 1.

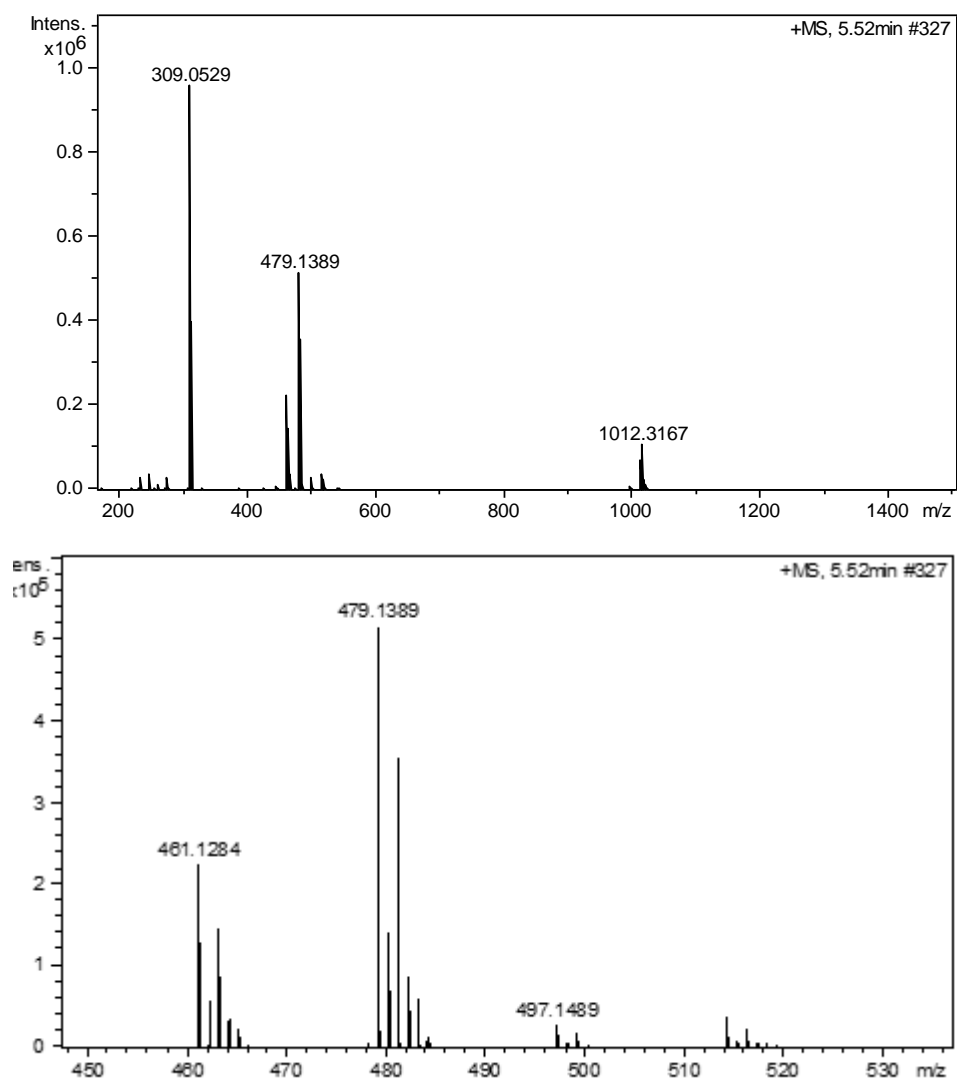

(A)

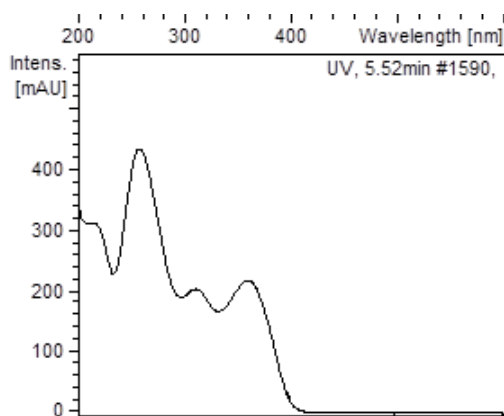

(B)

**Figure S9.** Electrospray-time of flight (ESI-TOF) (A) and UV (B) spectra of compound 2.

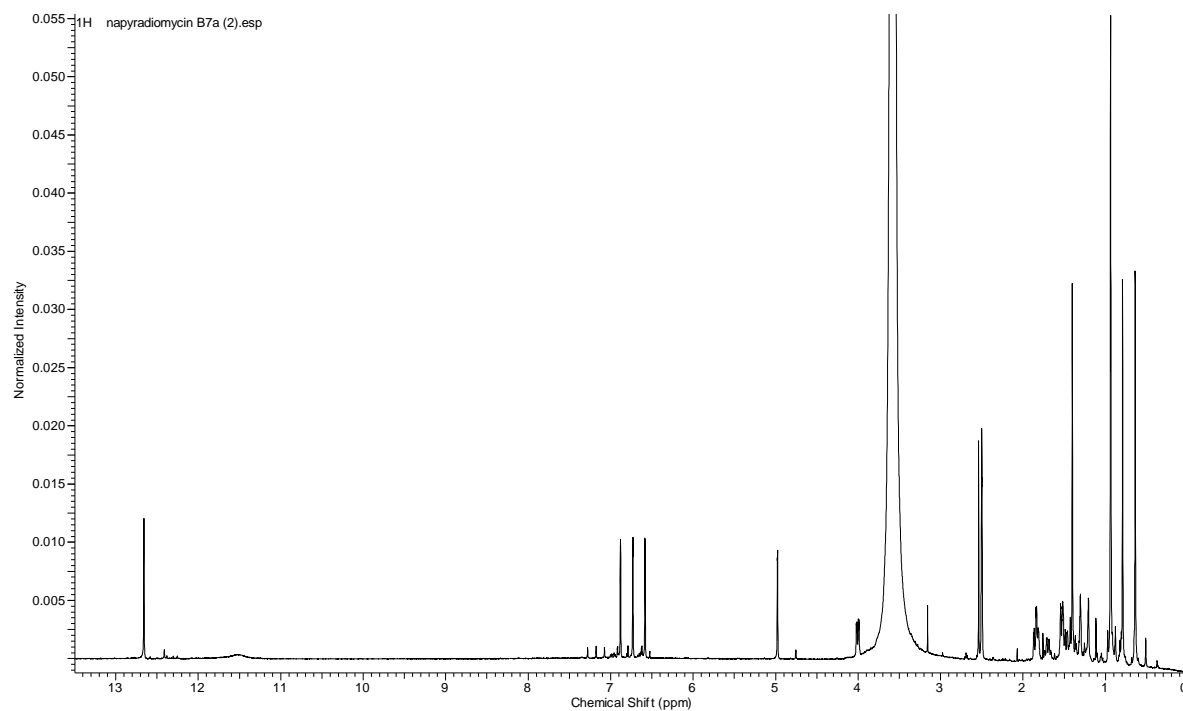

**Figure S10.** <sup>1</sup>H NMR (DMSO-d<sub>6</sub>, 500 MHz) of compound **2**.

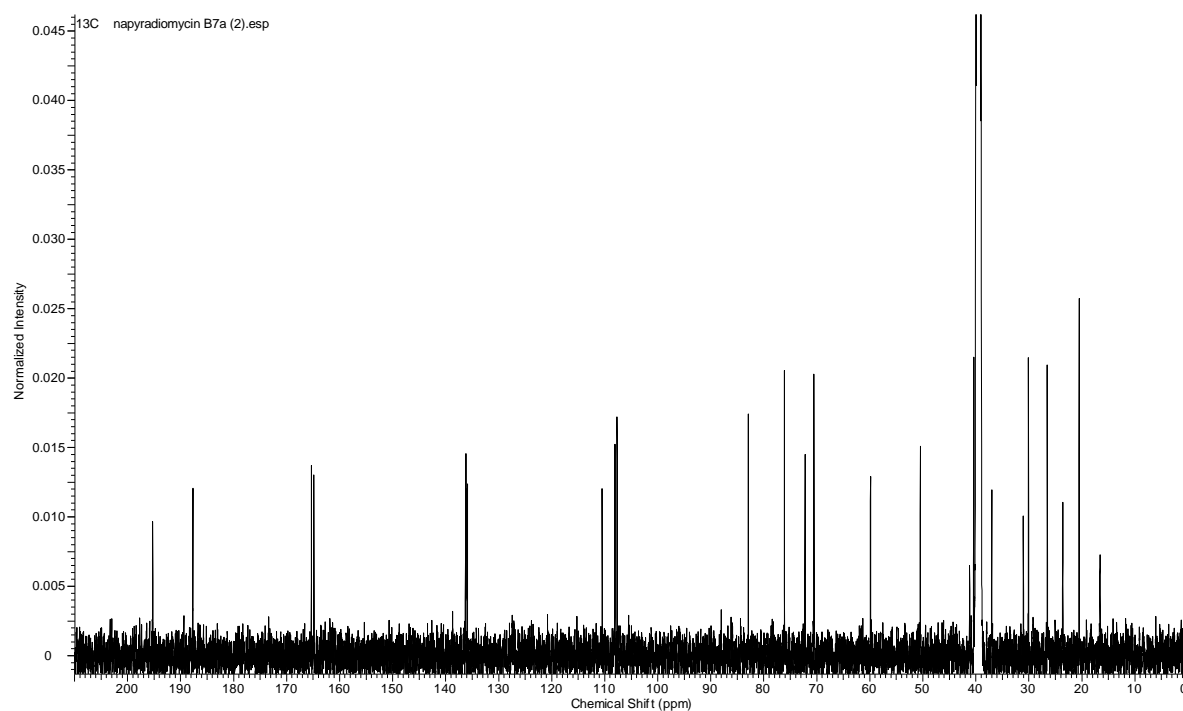

**Figure S11.** <sup>13</sup>C NMR (DMSO-d<sub>6</sub>, 500 MHz) of compound **2**.



HSQC napyradiomycin B7a (2).esp

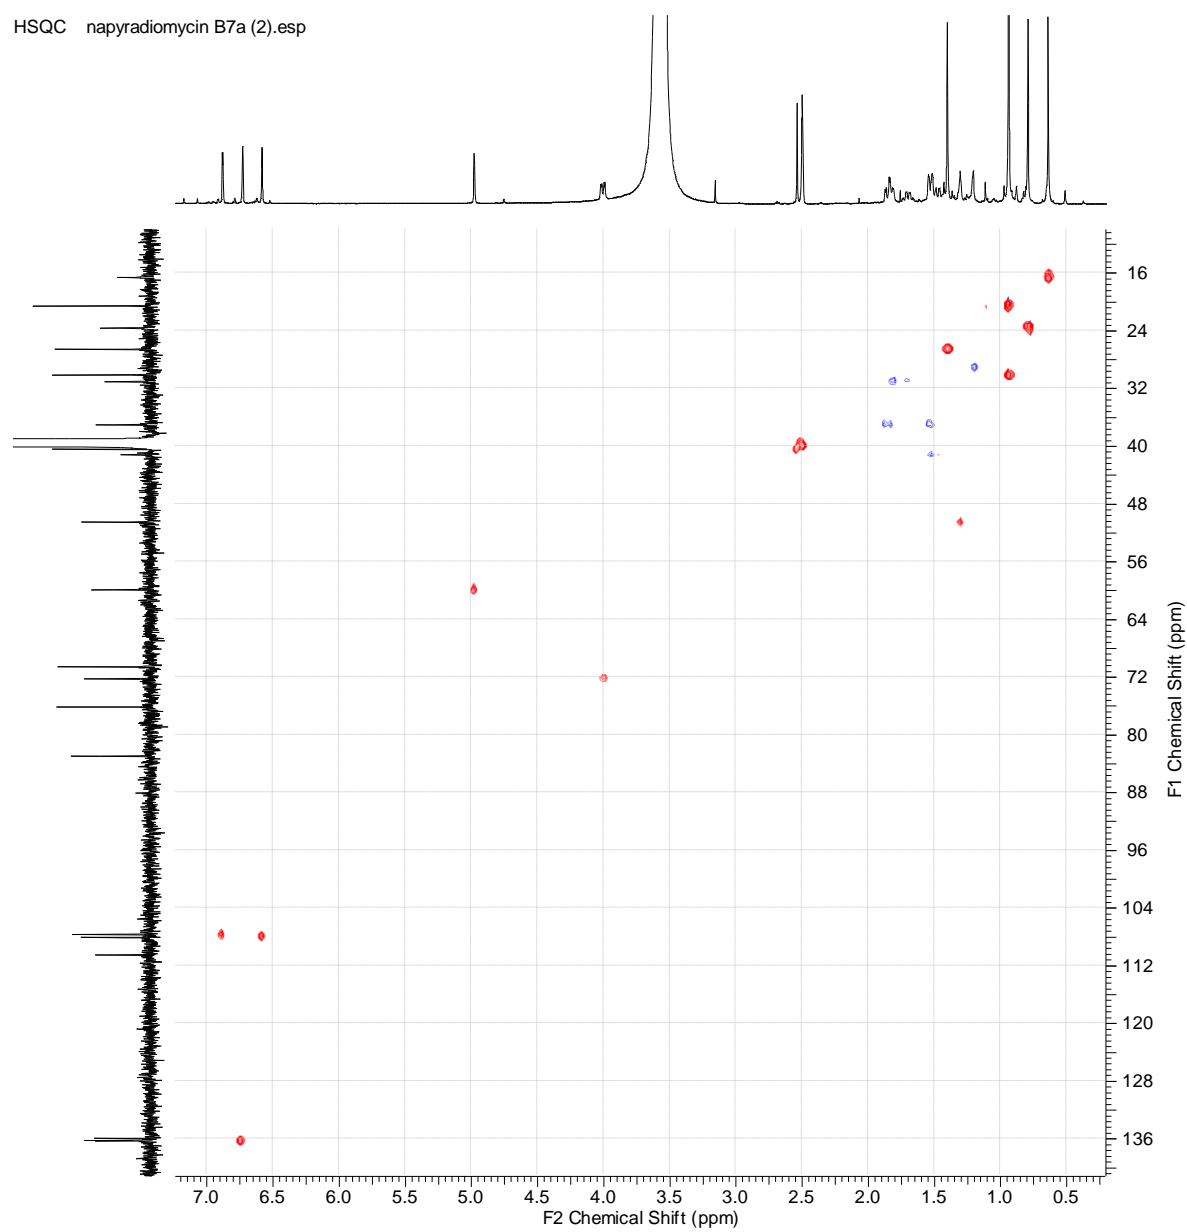

Figure S13. HSQC spectrum of compound 2.

HMBC napyradiomycin B7a (2).esp

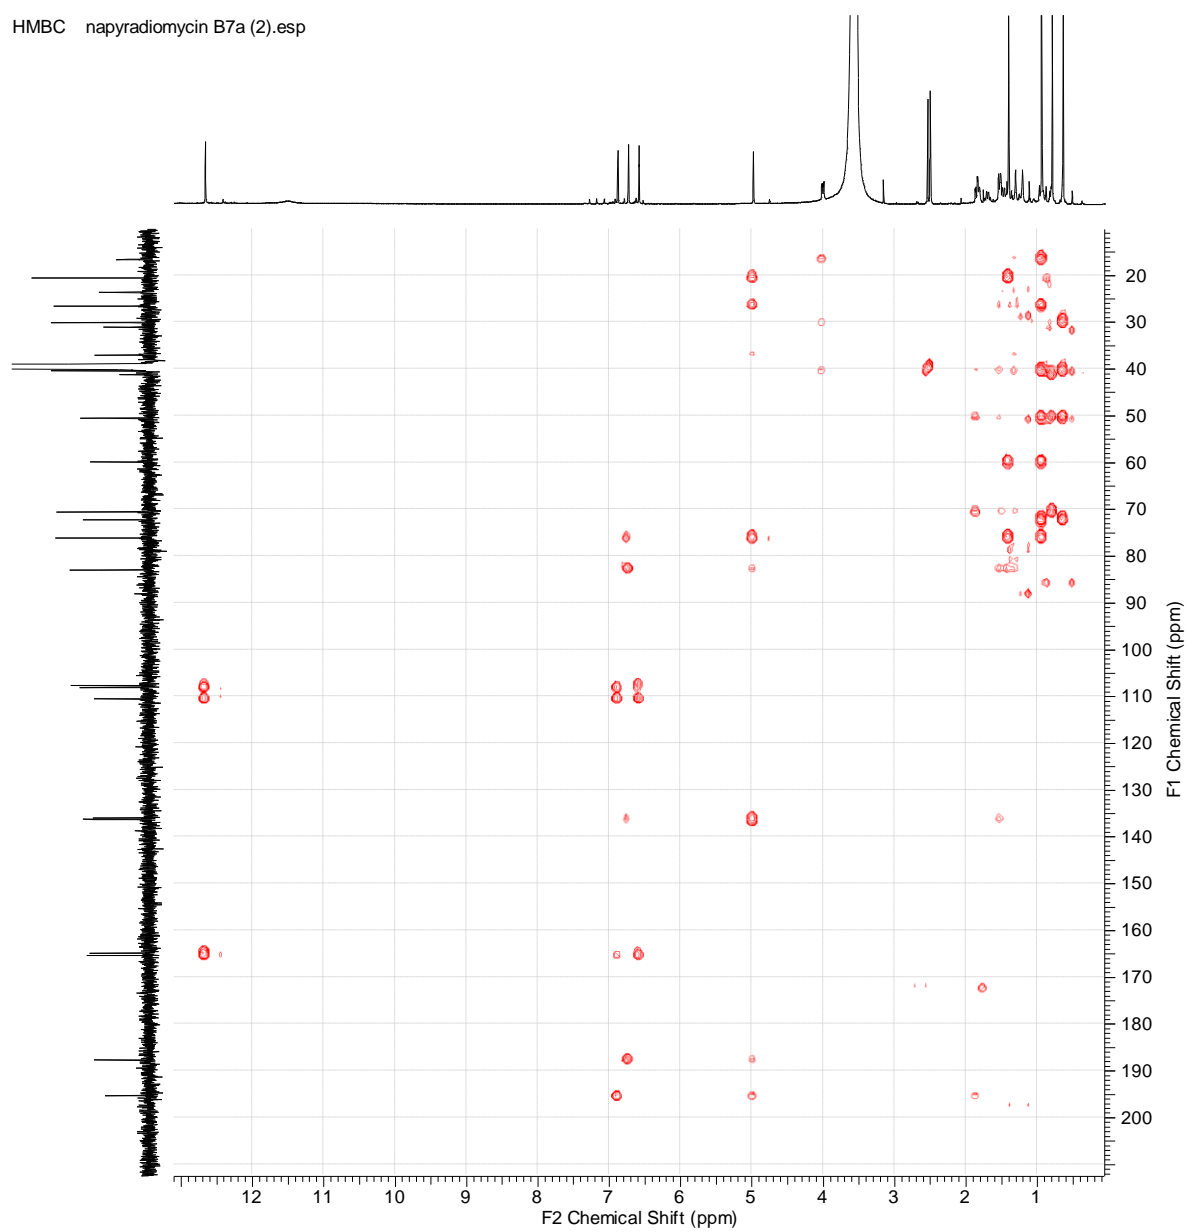

Figure S14. HMBC of compound 2.

NOESY napyradiomycin B7a (2).esp

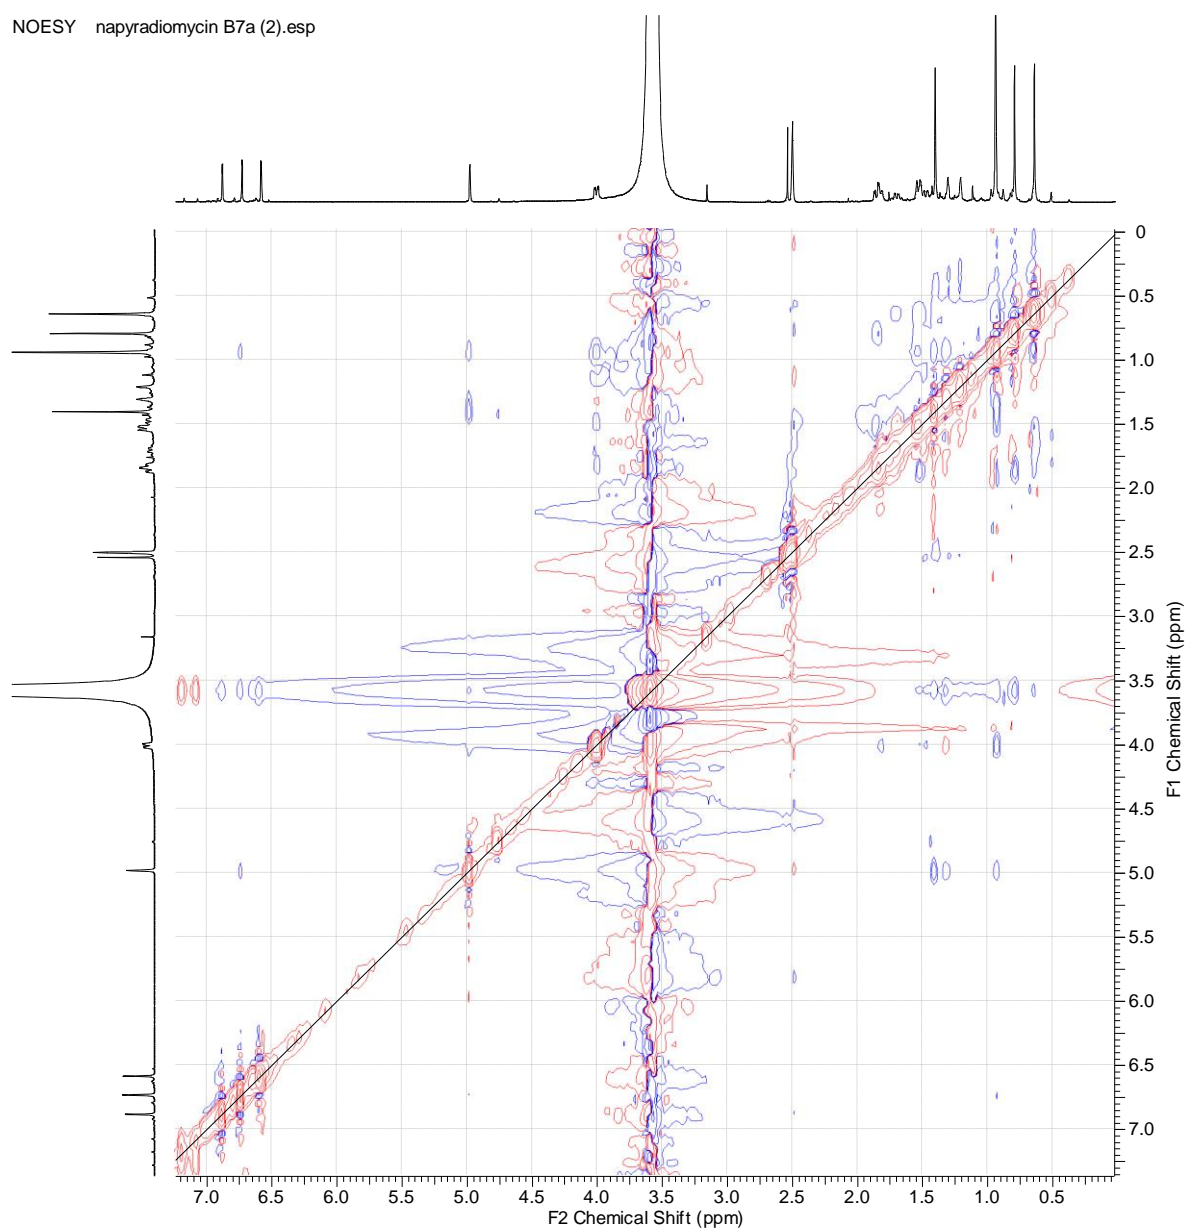

Figure S15. NOESY of compound 2.

ROESY napyradiomycin B7a (2).esp

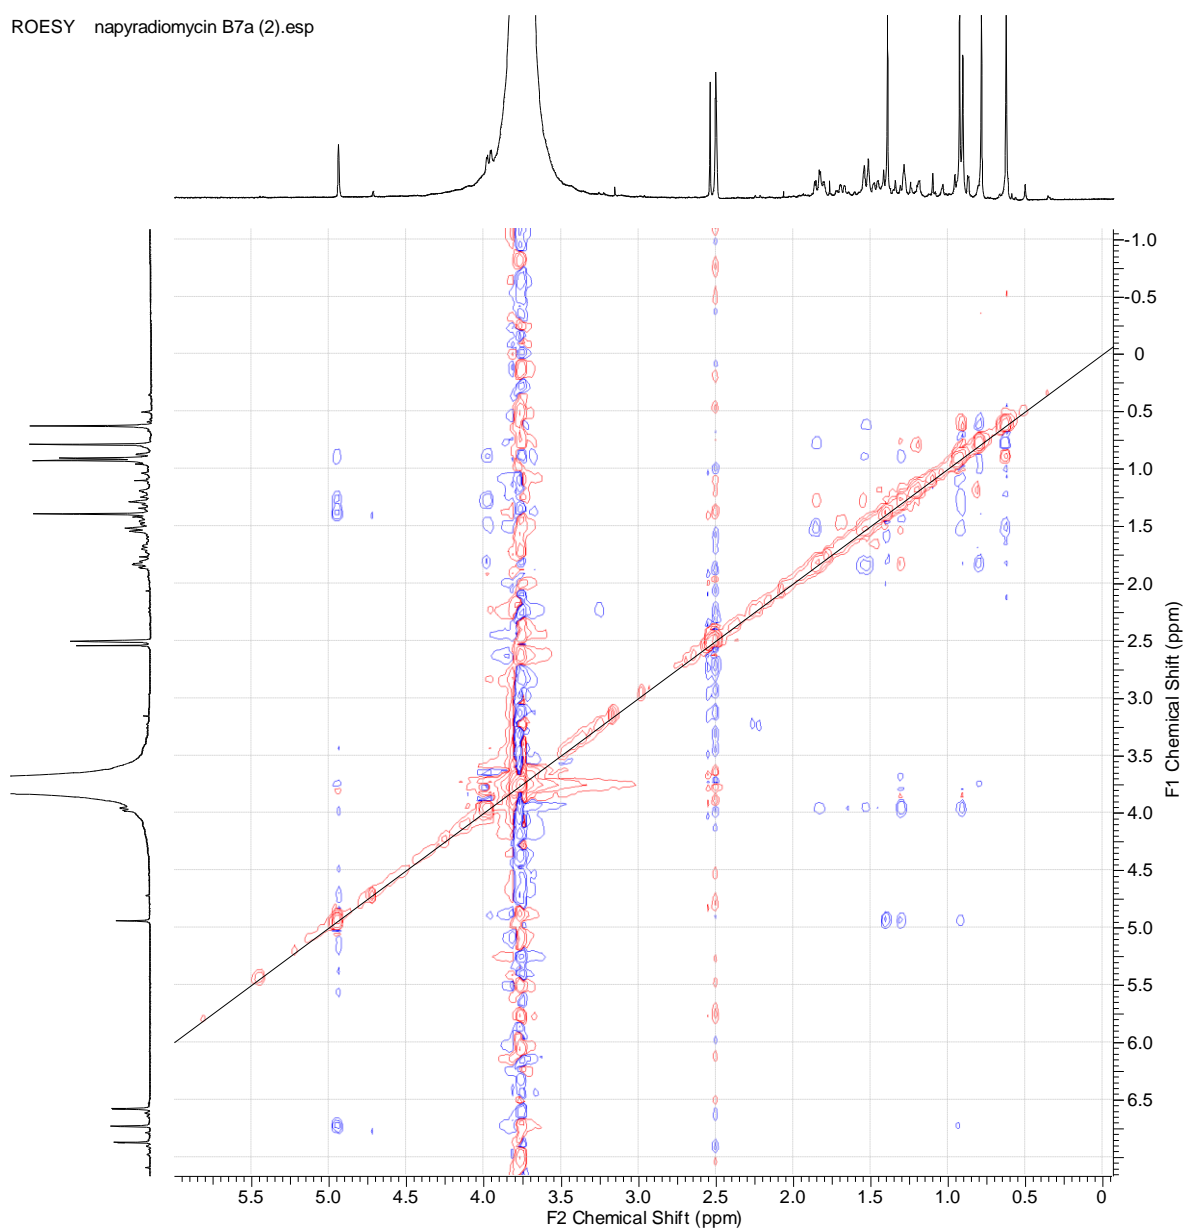

Figure S16. ROESY of compound 2.



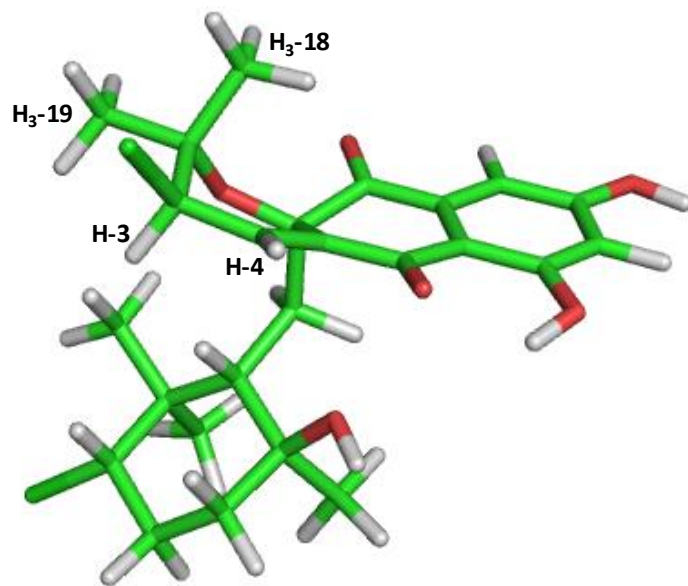

Figure S17. Energy minimized molecular model of compound 2.

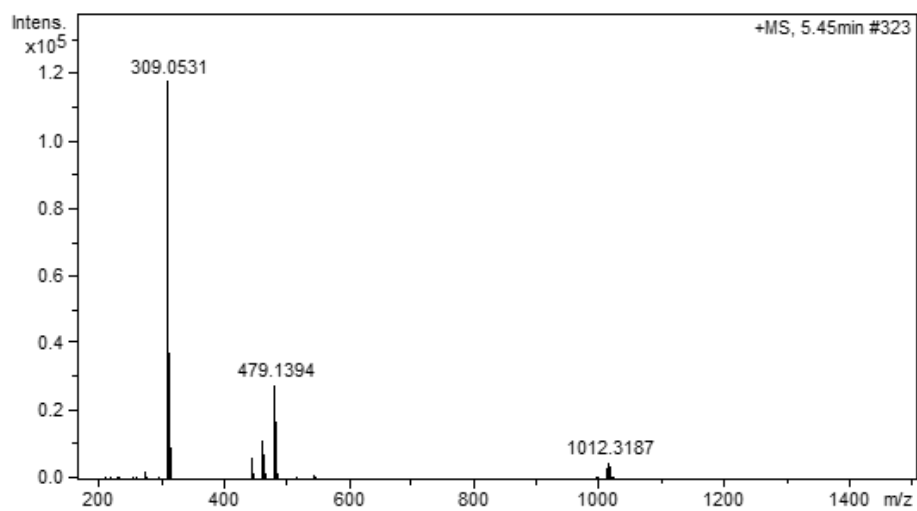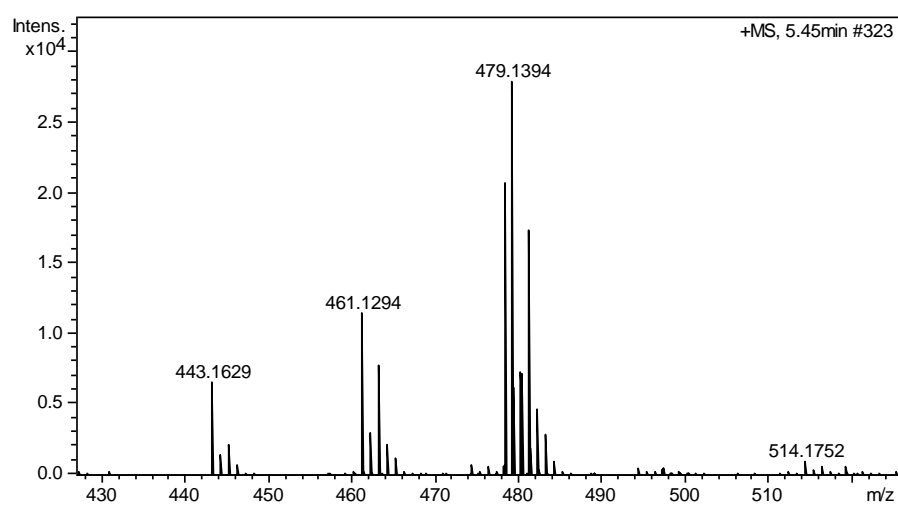

(A)

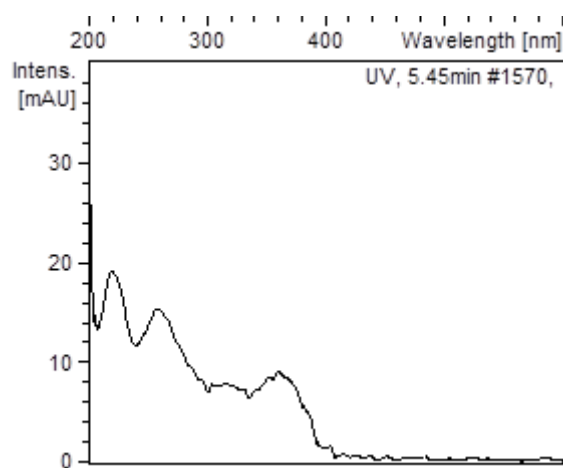

(B)

**Figure S18.** Electrospray-time of flight (ESI-TOF) (A) and UV (B) spectra of compound 3.

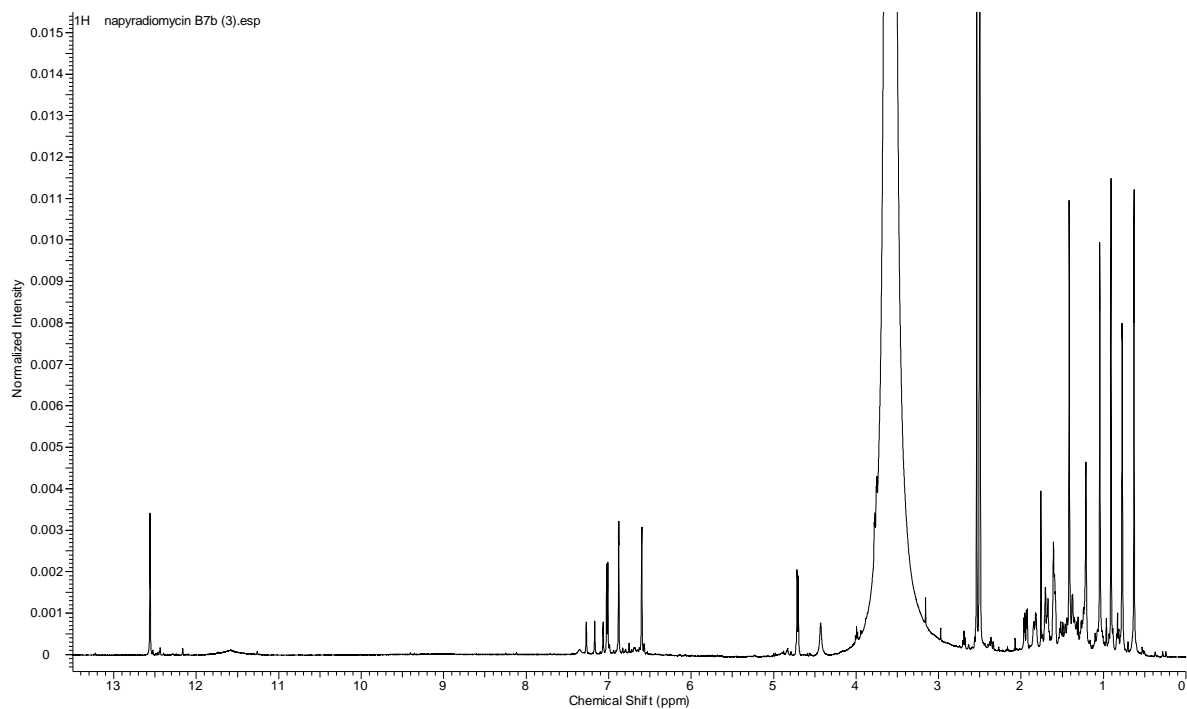

**Figure S19.** <sup>1</sup>H NMR (DMSO-d<sub>6</sub>, 500 MHz) of compound 3.

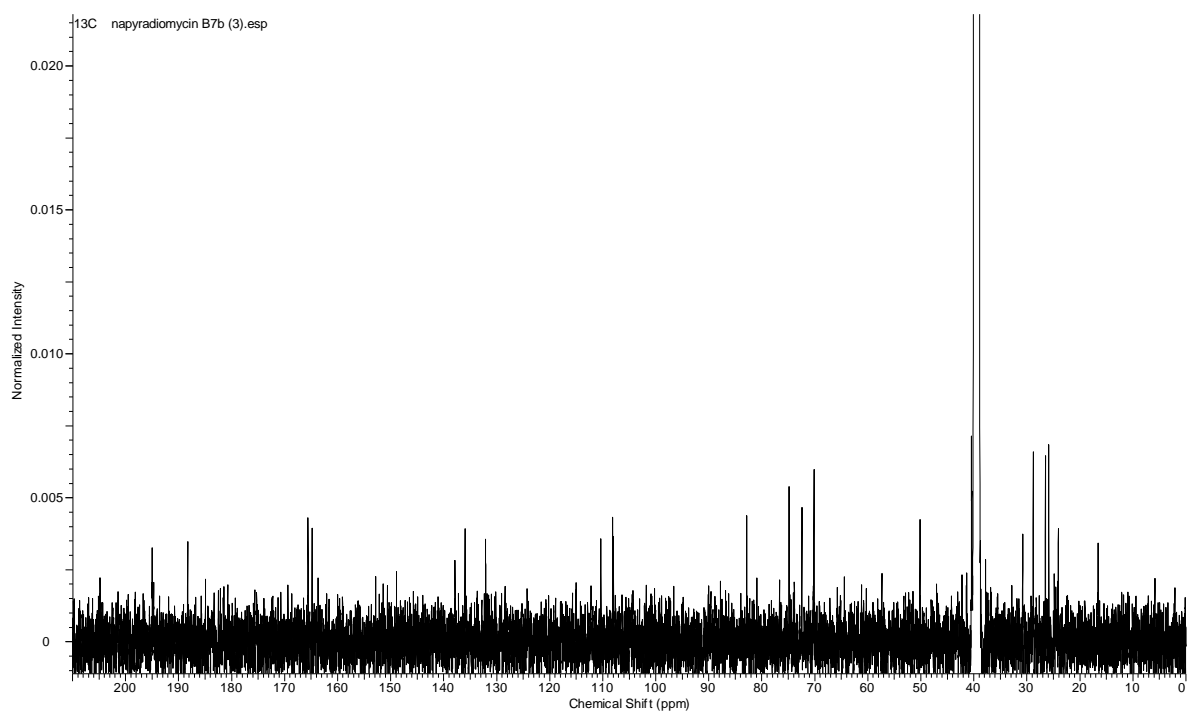

**Figure S20.** <sup>13</sup>C NMR (DMSO-d<sub>6</sub>, 500 MHz) of compound 3.

COSY napyradiomycin B7b (3).esp

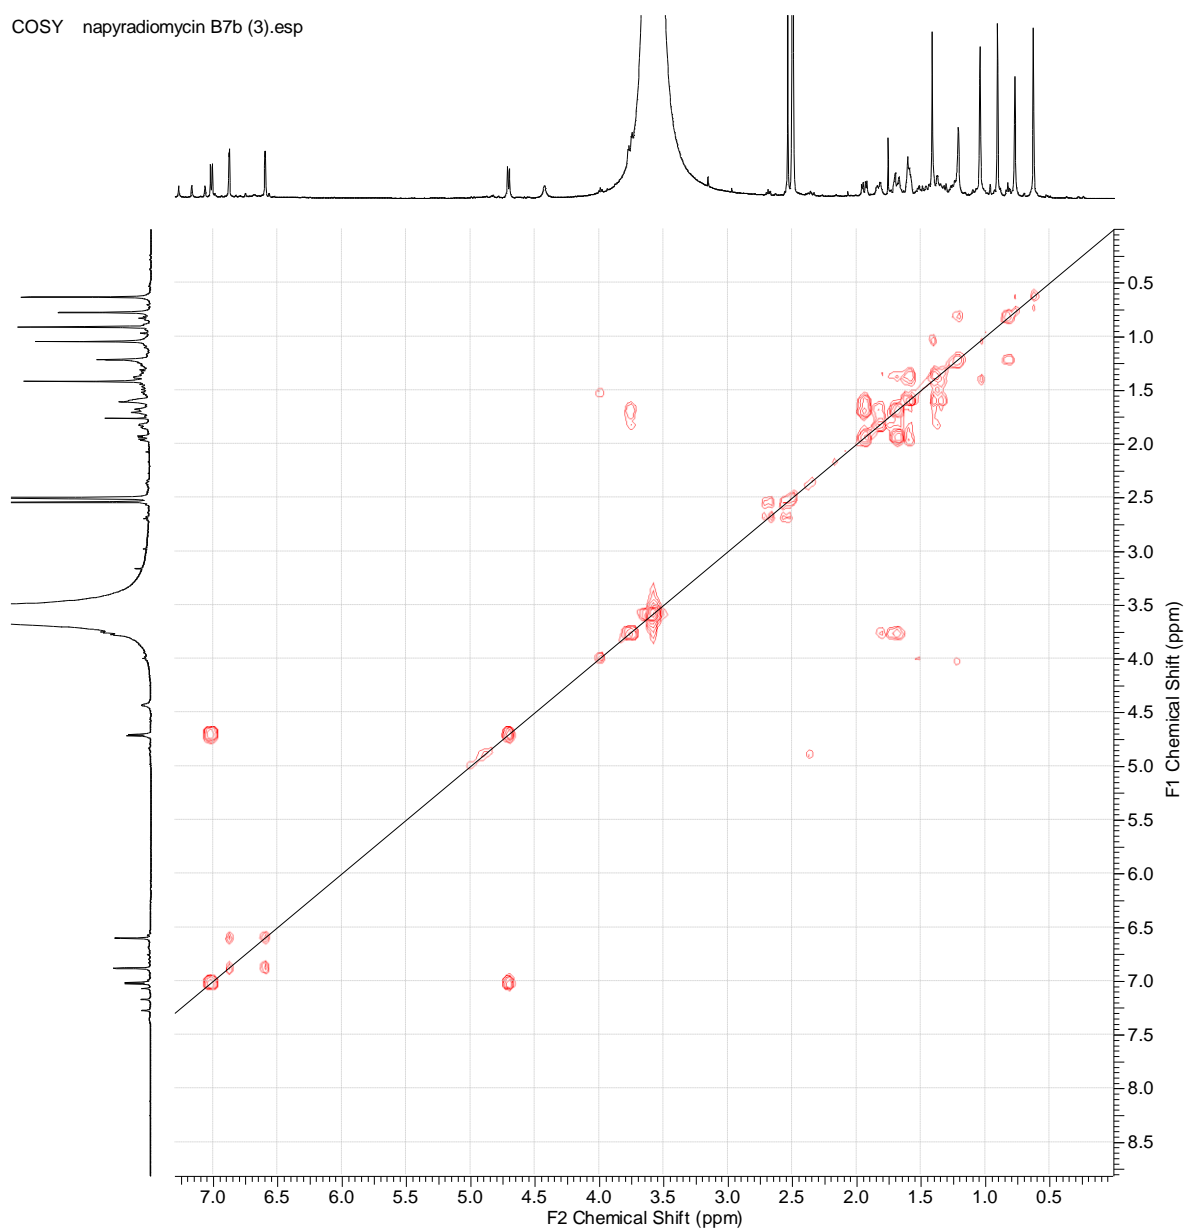**Figure S21.** COSY of compound 3.

HSQC napyradiomycin B7b (3).esp

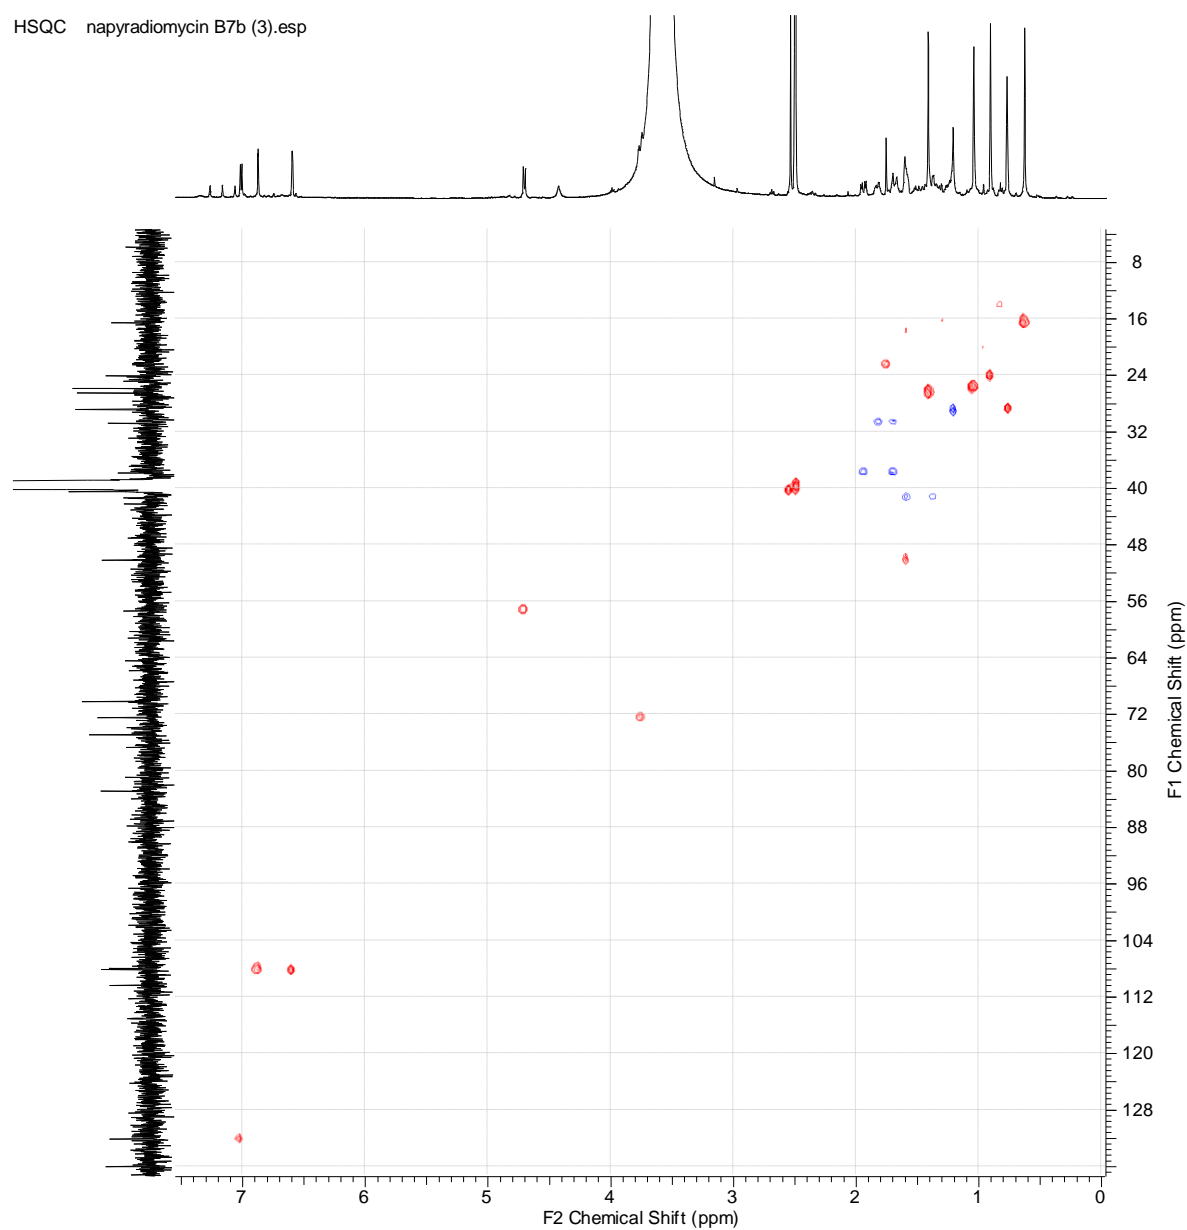

Figure S22. HSQC spectrum of compound 3.

HMBC napyradiomycin B7b (3).esp

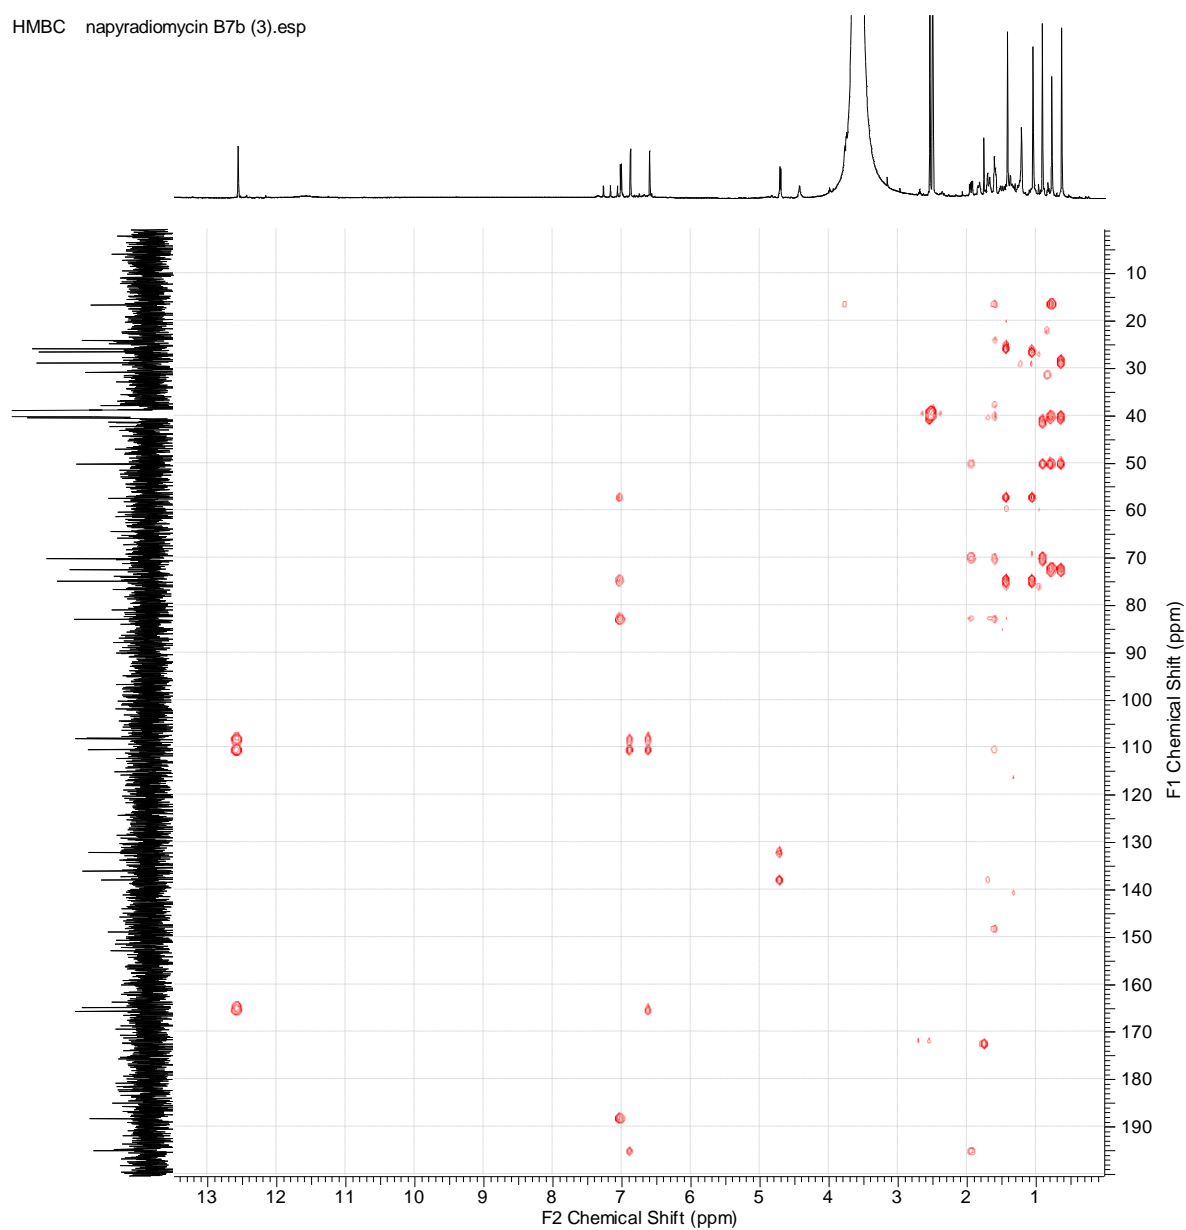

Figure S23. HMBC of compound 3.

NOESY napyradiomycin B7b (3).esp

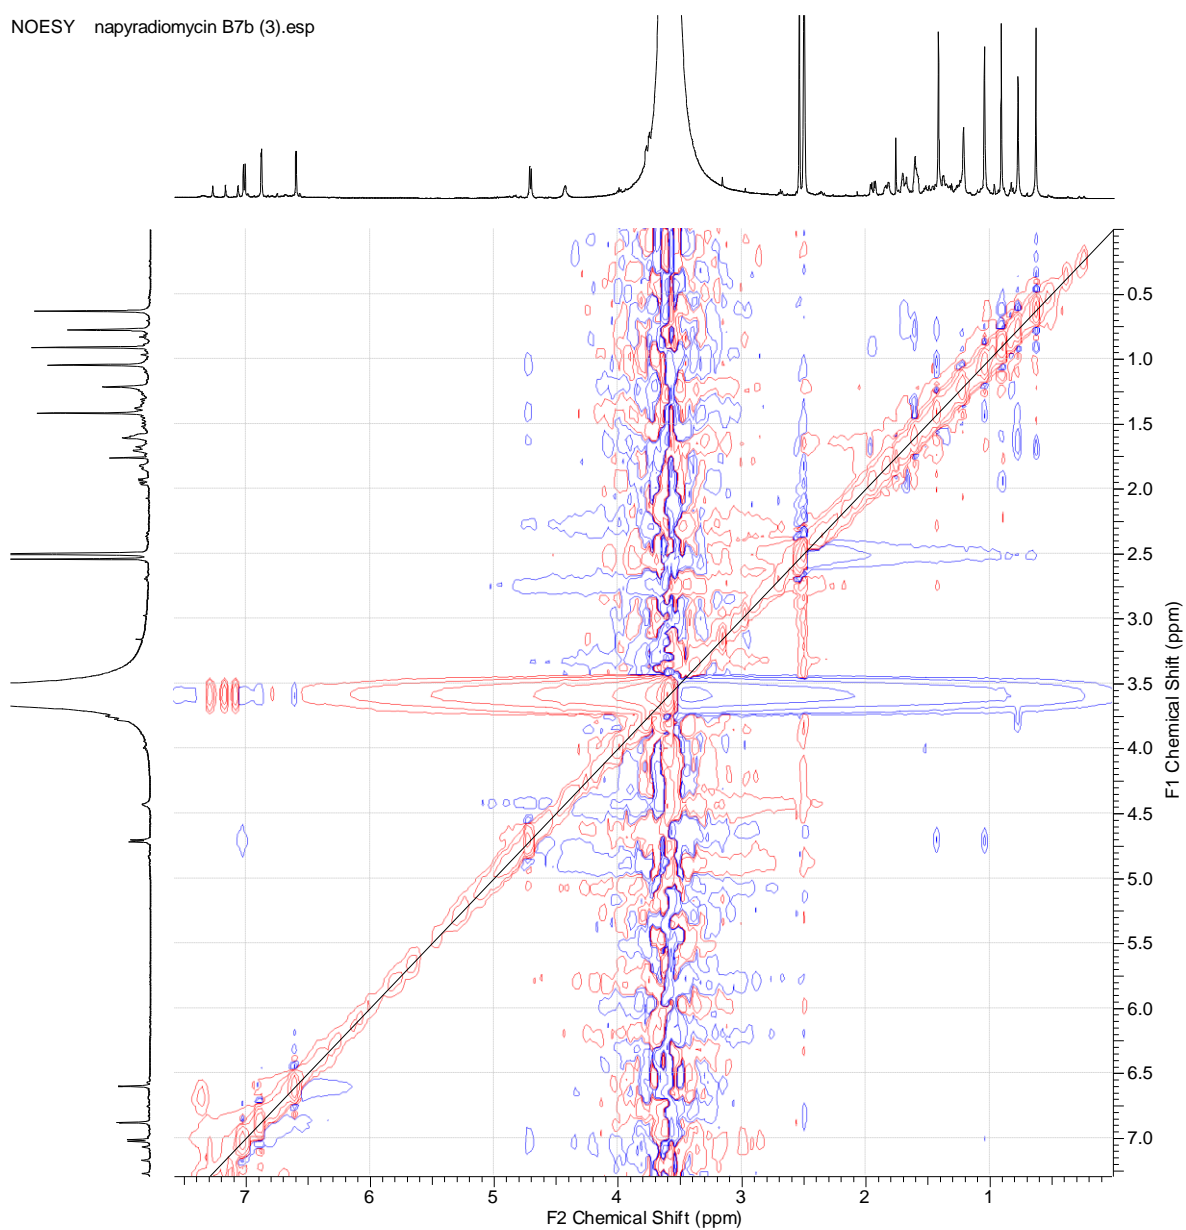

Figure S24. NOESY of compound 3.

ROESY napyradiomycin B7b (3).esp

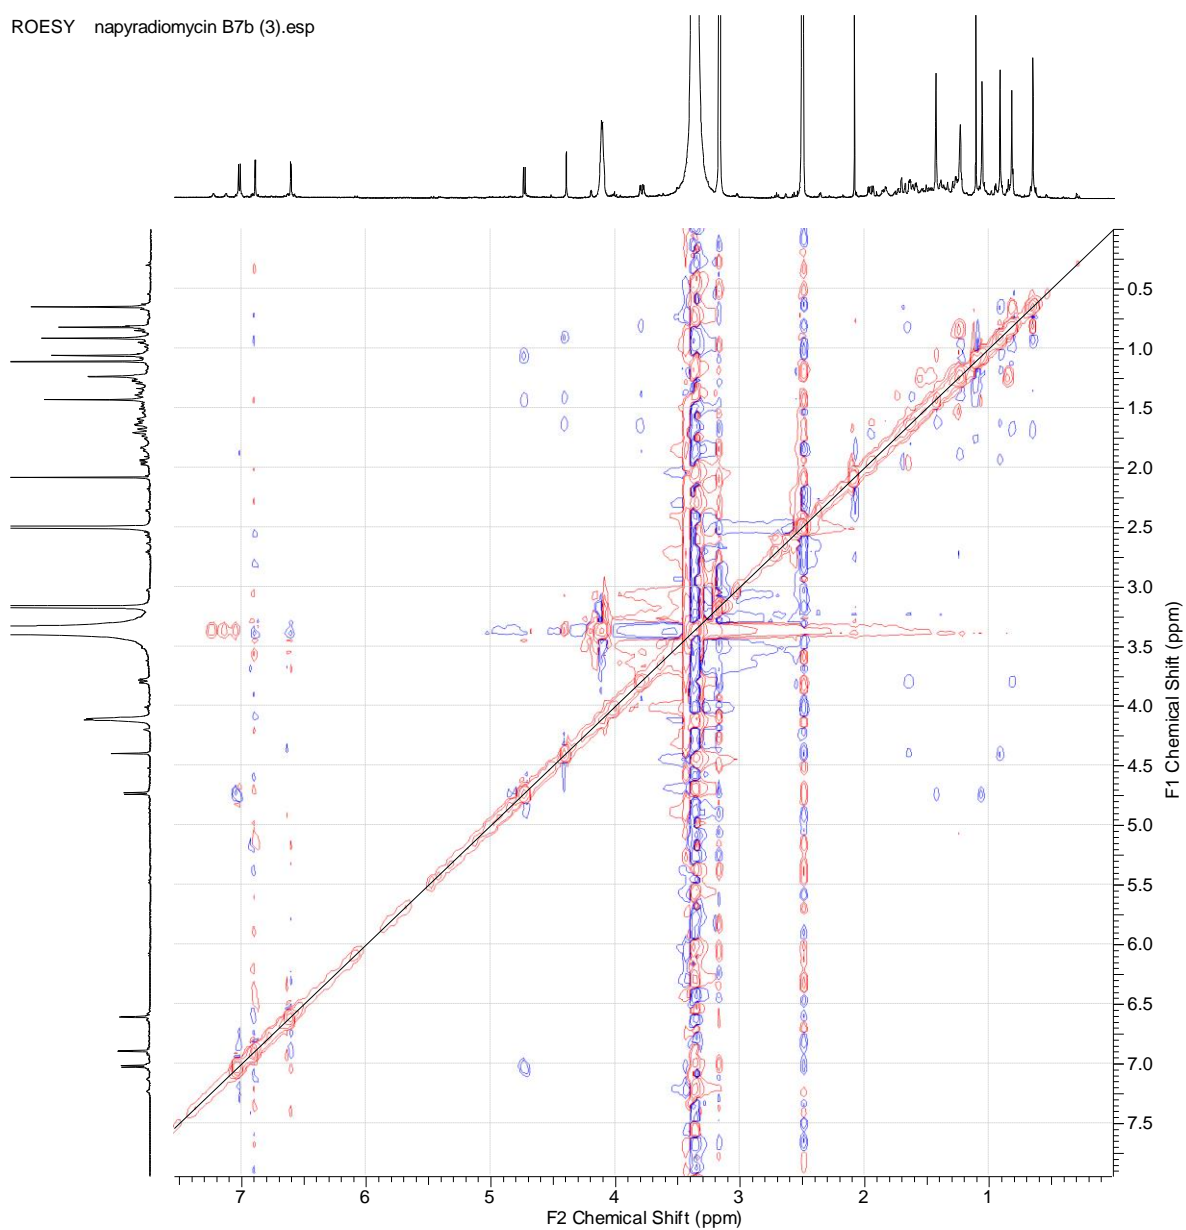

Figure S25. ROESY of compound 3.



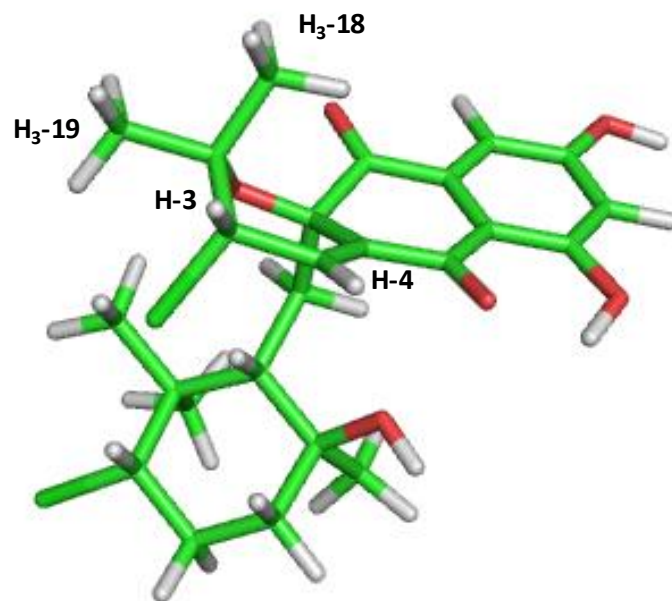

Figure S26. Energy minimized molecular model of compound 3.

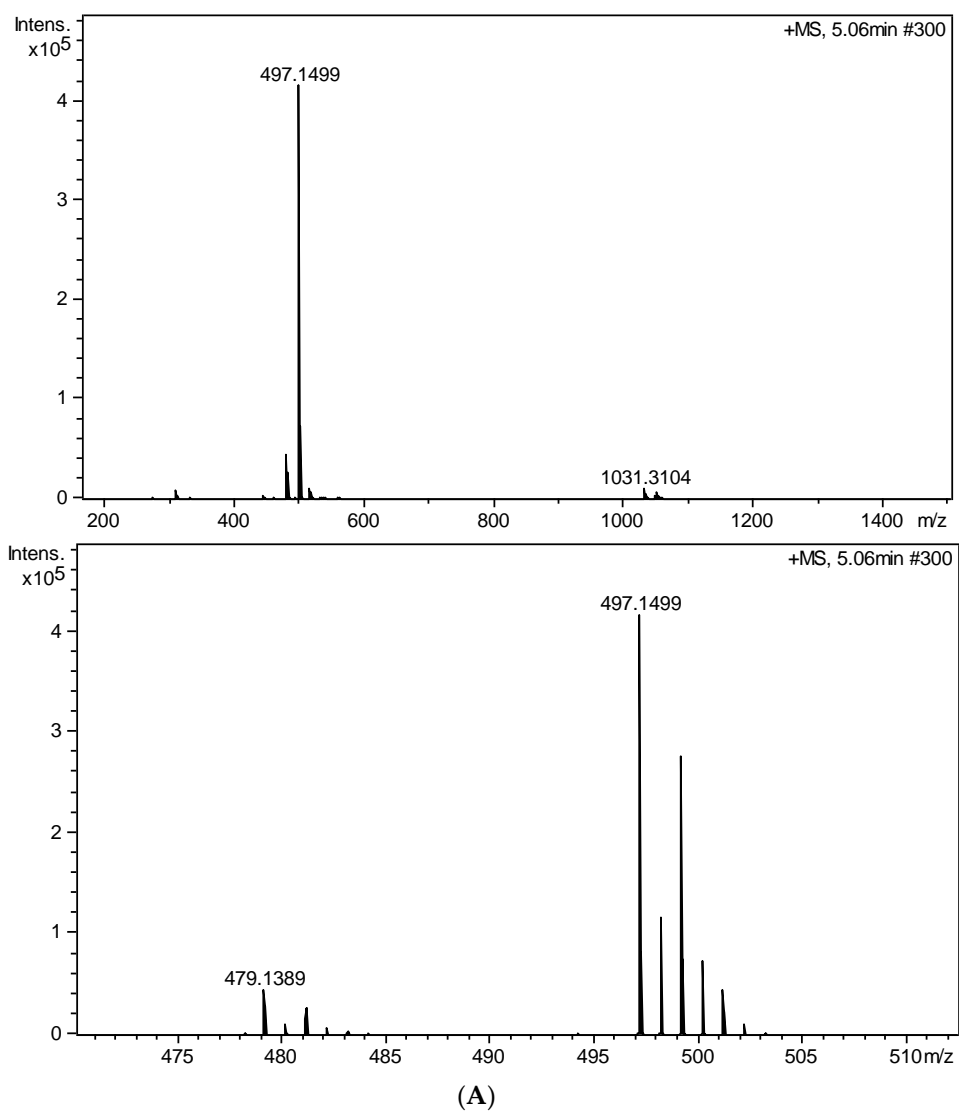

(A)

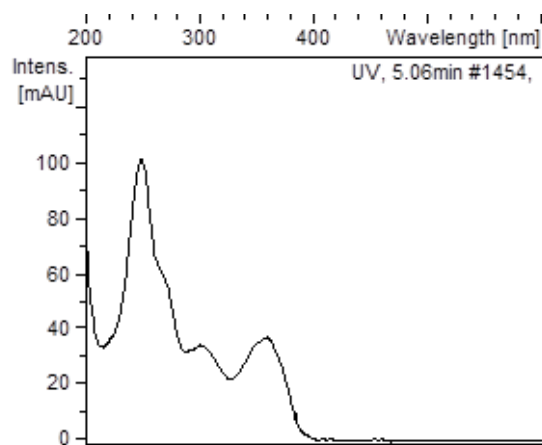

(B)

Figure S27. Electrospray-time of flight (ESI-TOF) (A) and UV (B) spectra of compound 4.

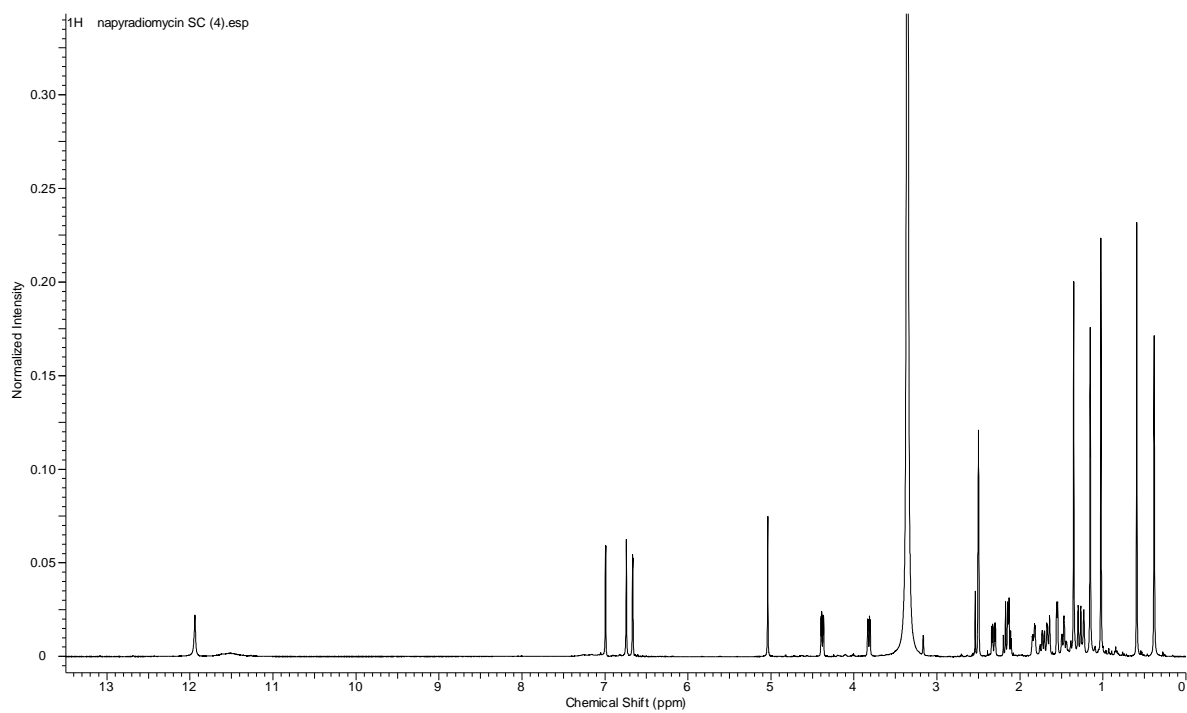

**Figure S28.** <sup>1</sup>H NMR (DMSO-d<sub>6</sub>, 500 MHz) of compound 4.

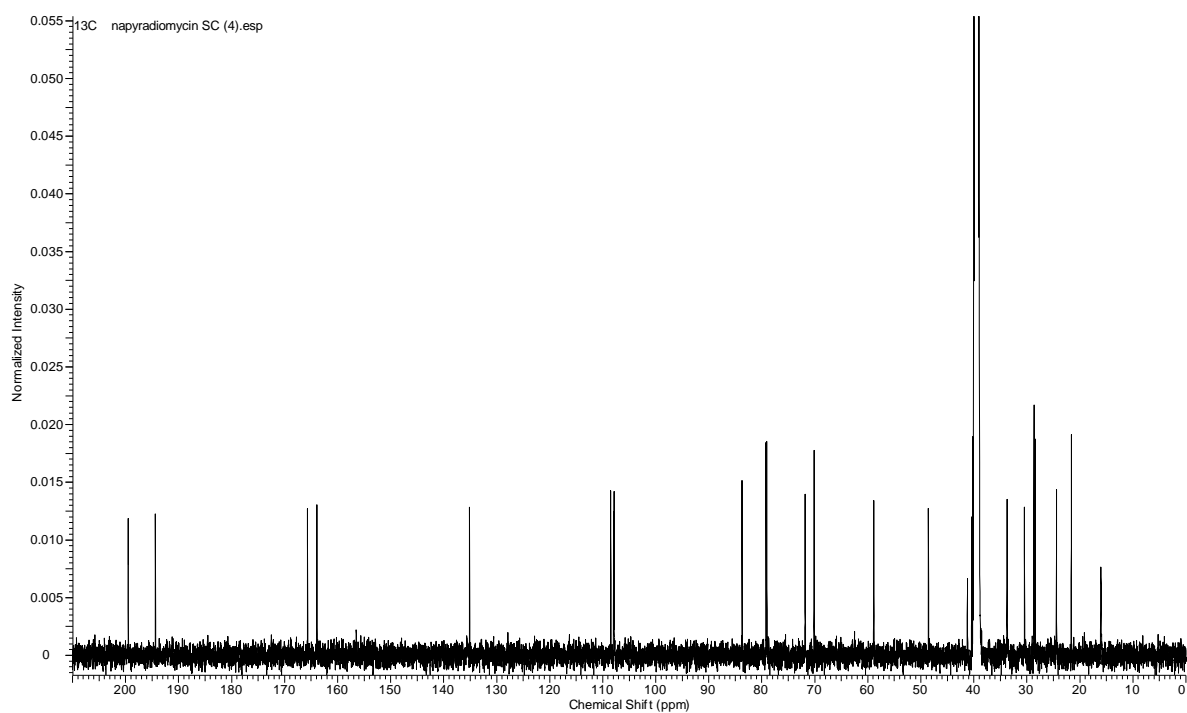

**Figure S29.** <sup>13</sup>C NMR (DMSO-d<sub>6</sub>, 500 MHz) of compound 4.

COSY napradiomycin SC (4).esp

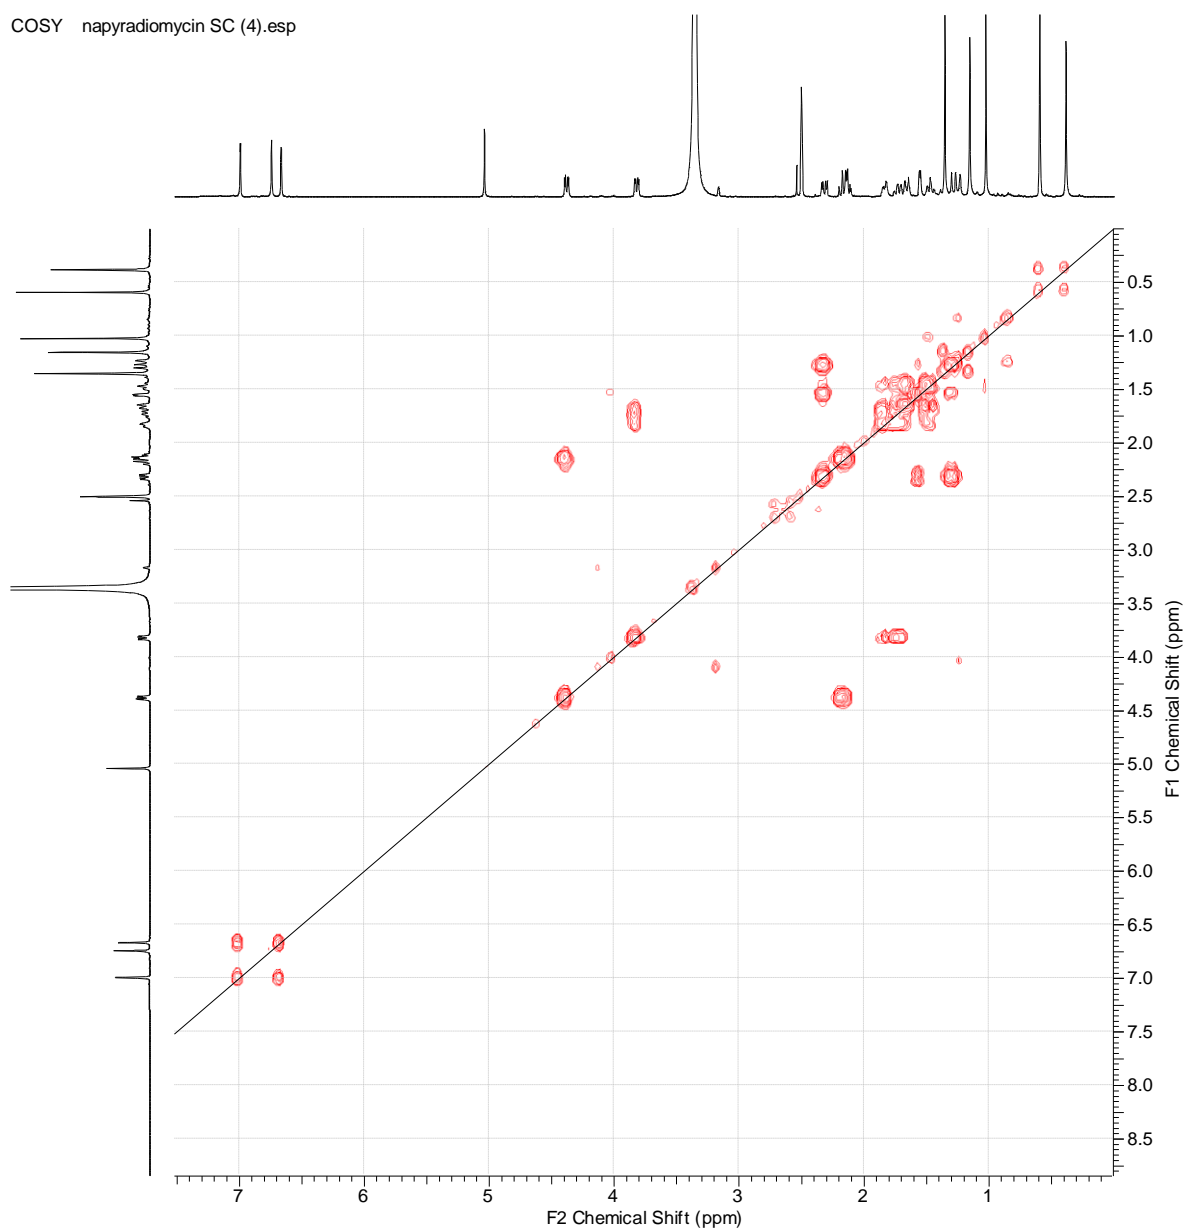**Figure S30.** COSY of compound 4.

HSQC napyradiomycin SC (4).esp

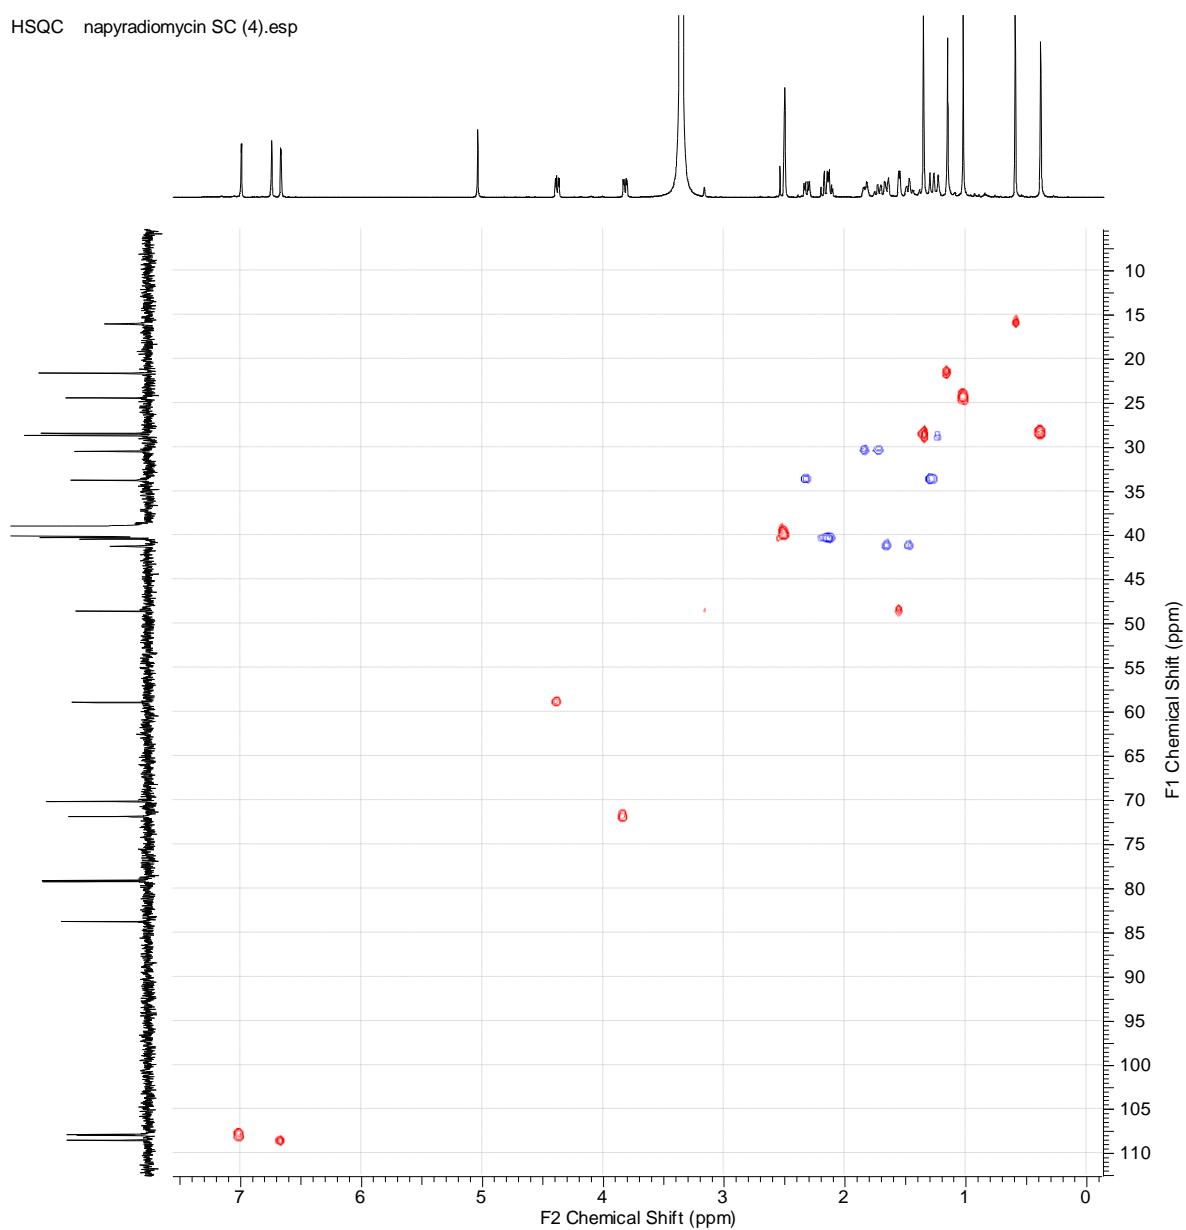

Figure S31. HSQC spectrum of compound 4.

HMBC napyradiomycin SC (4).esp

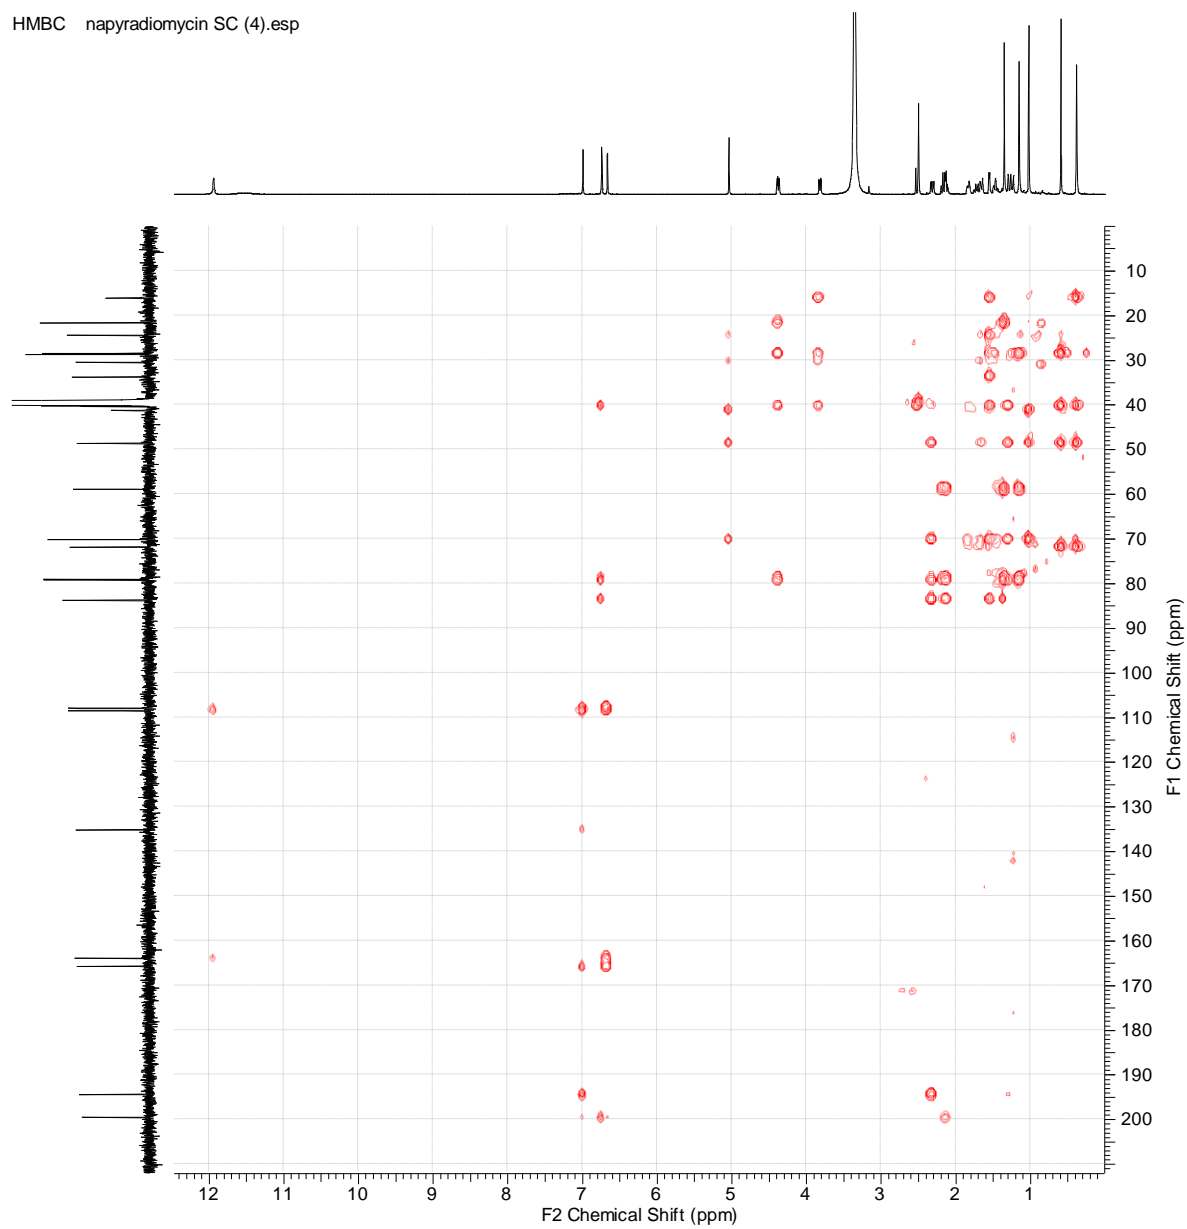

Figure S32. HMBC of compound 4.

NOESY napyradiomycin SC (4).esp

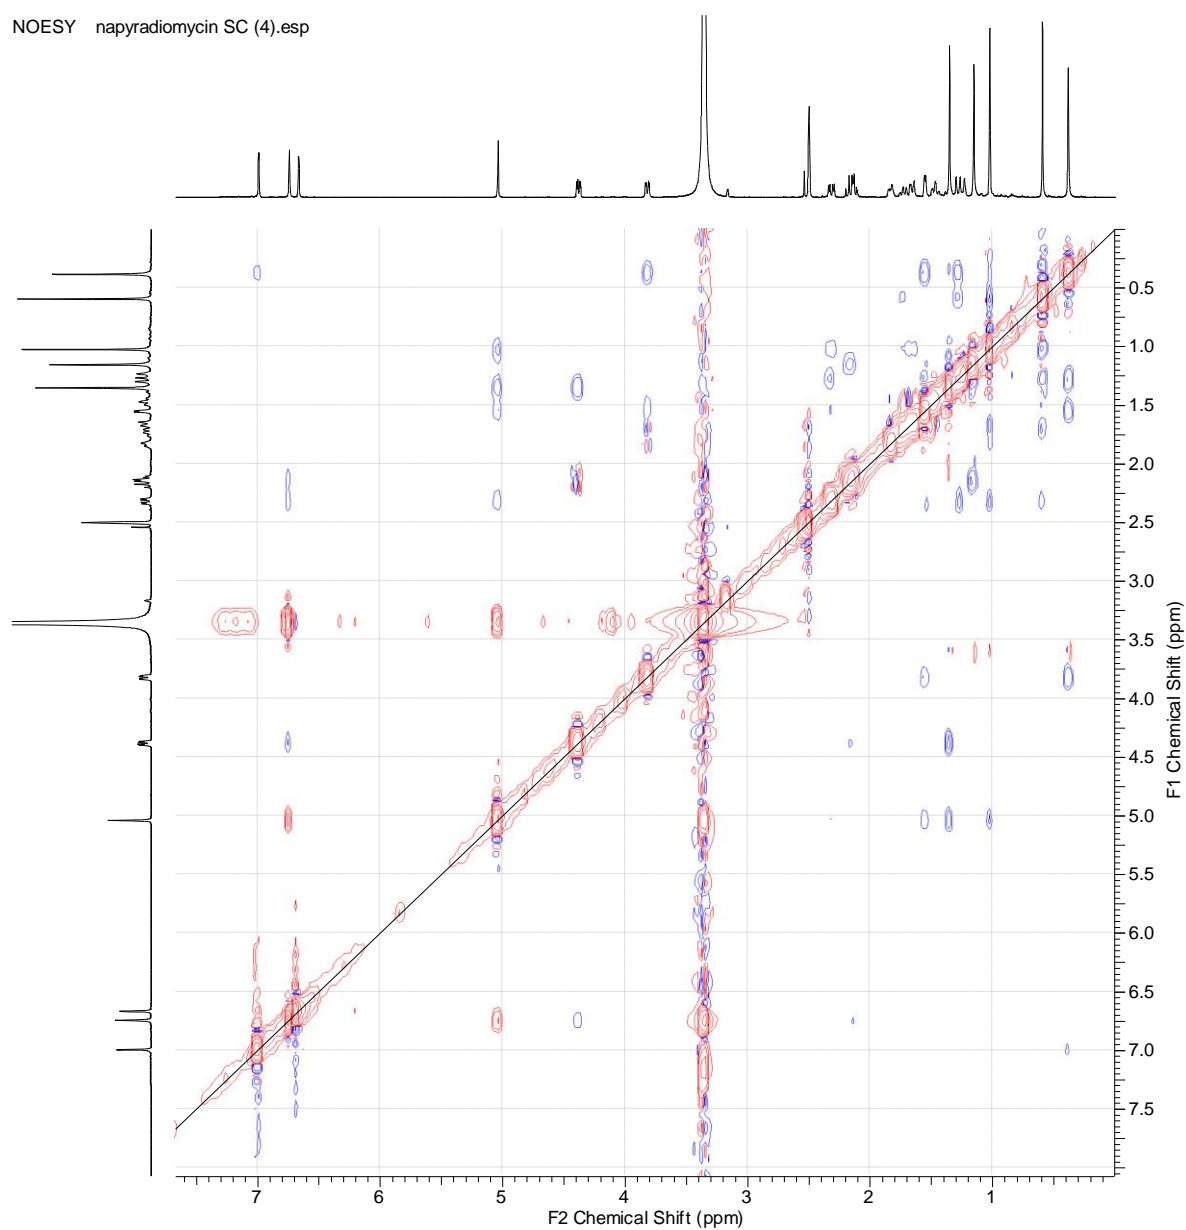

Figure S33. NOESY of compound 4.

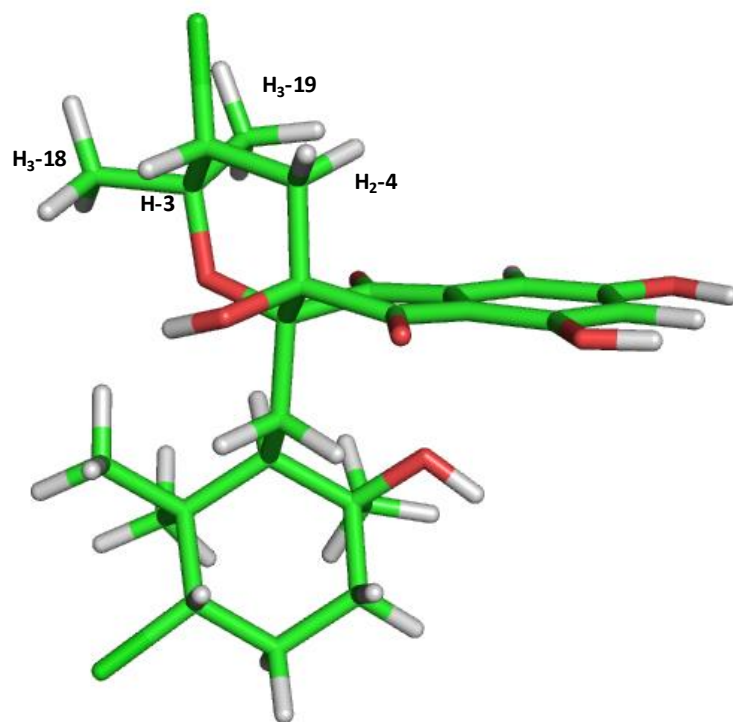

Figure S34. Energy minimized molecular model of compound 4.



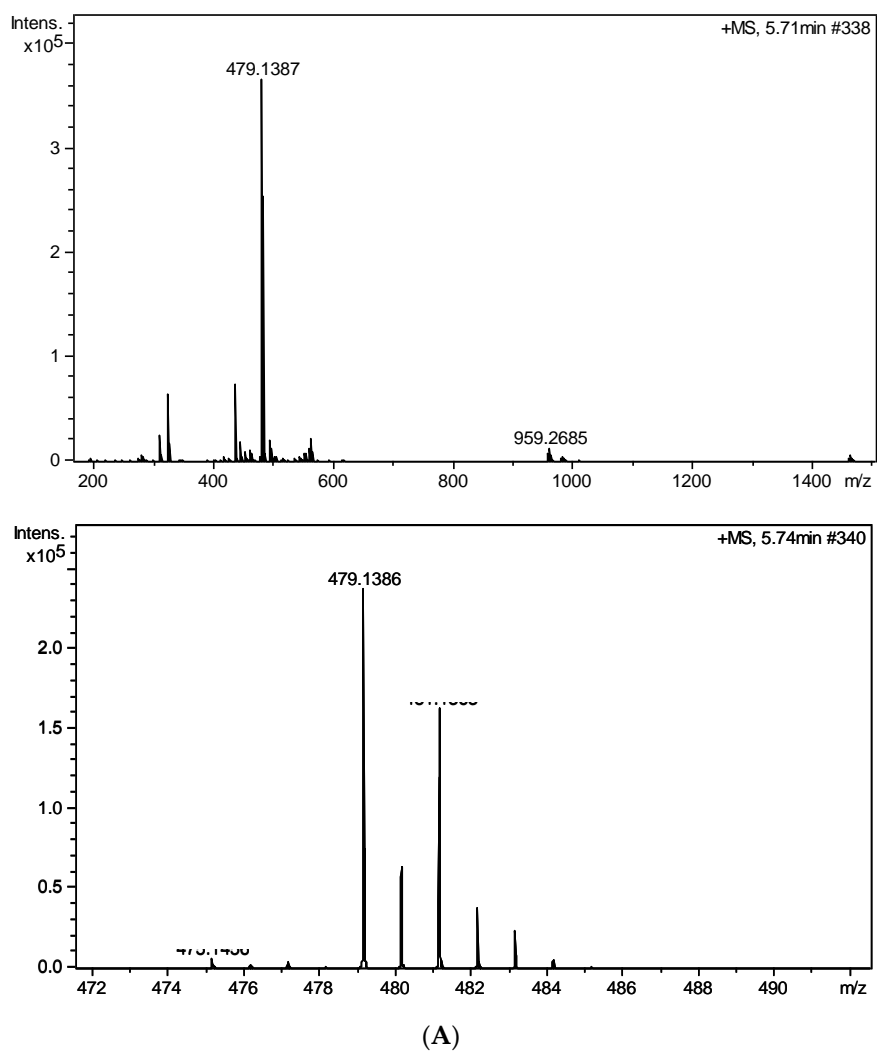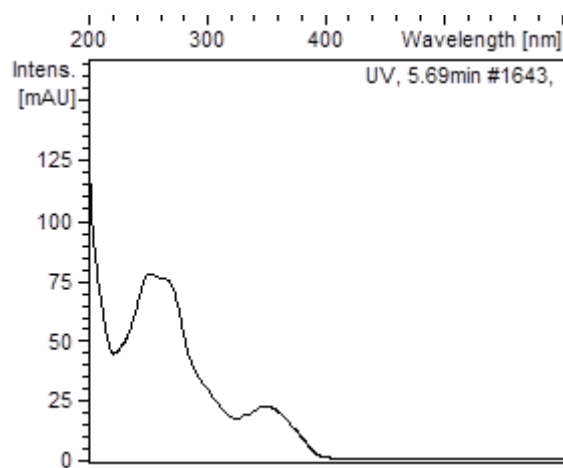

Figure S35. Electrospray-time of flight (ESI-TOF) (A) and UV (B) spectra of compound 5.

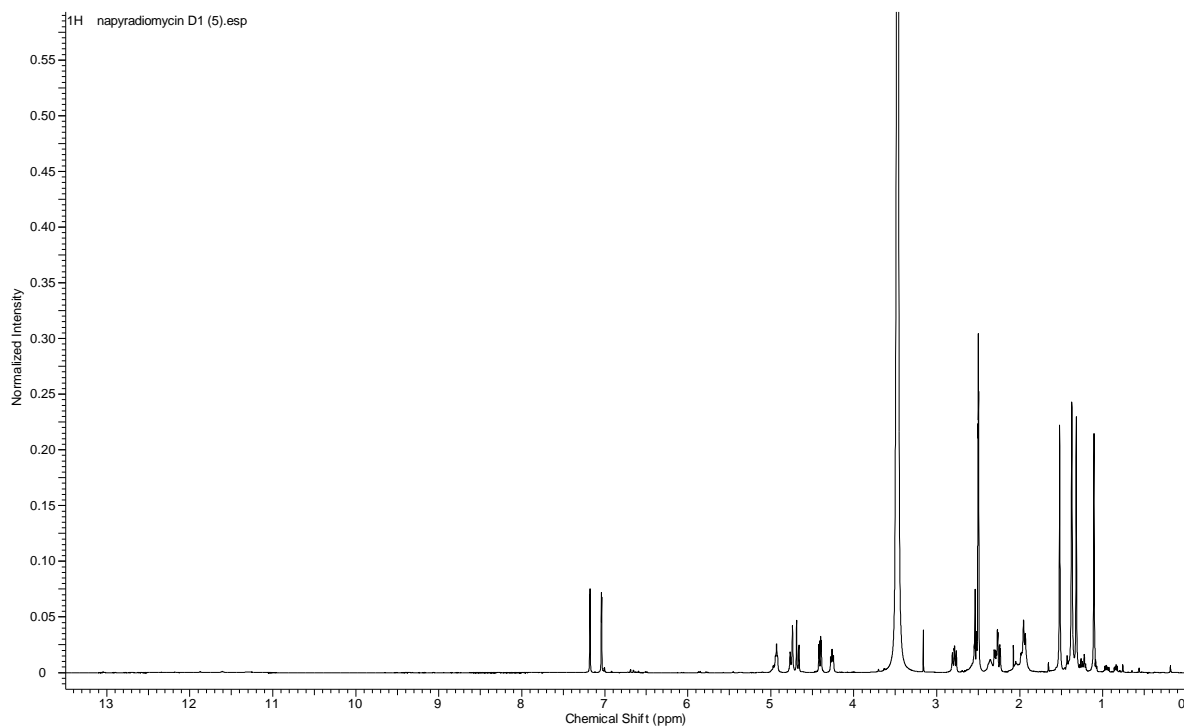

Figure S36. <sup>1</sup>H NMR (DMSO-d<sub>6</sub>, 500 MHz) of compound 5.

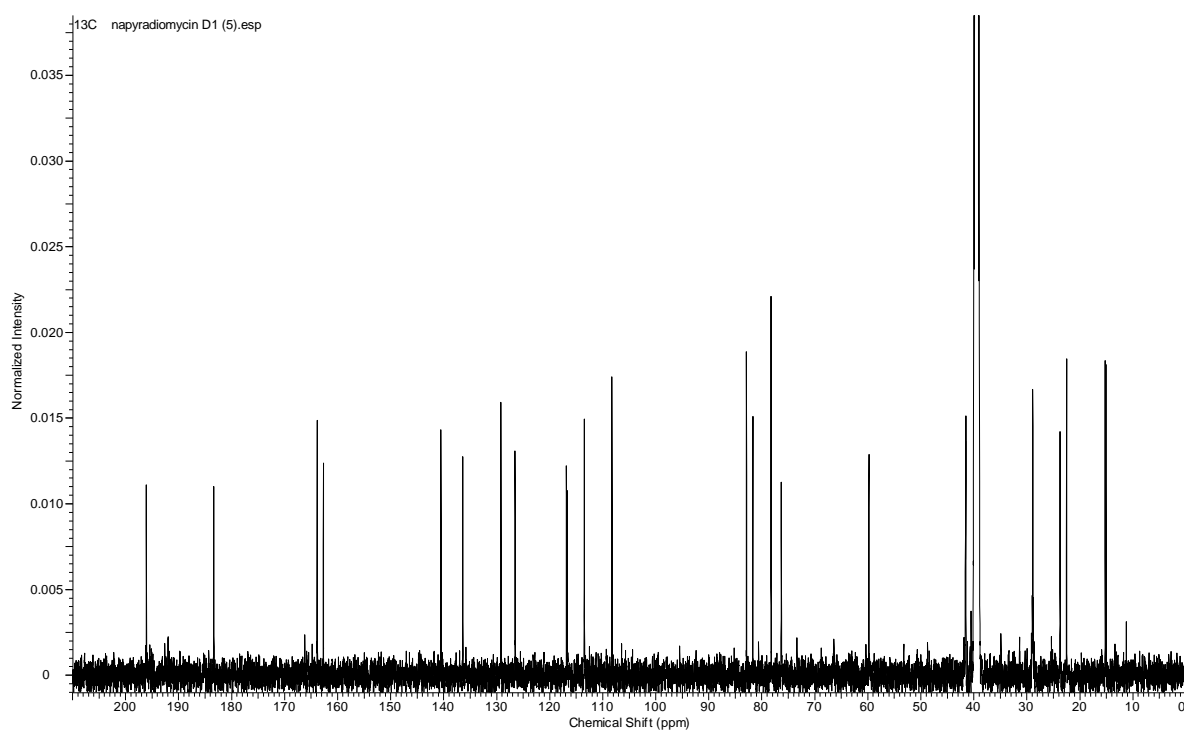

Figure S37. <sup>13</sup>C NMR (DMSO-d<sub>6</sub>, 500 MHz) of compound 5.

COSY napradiomycin D1 (5).esp

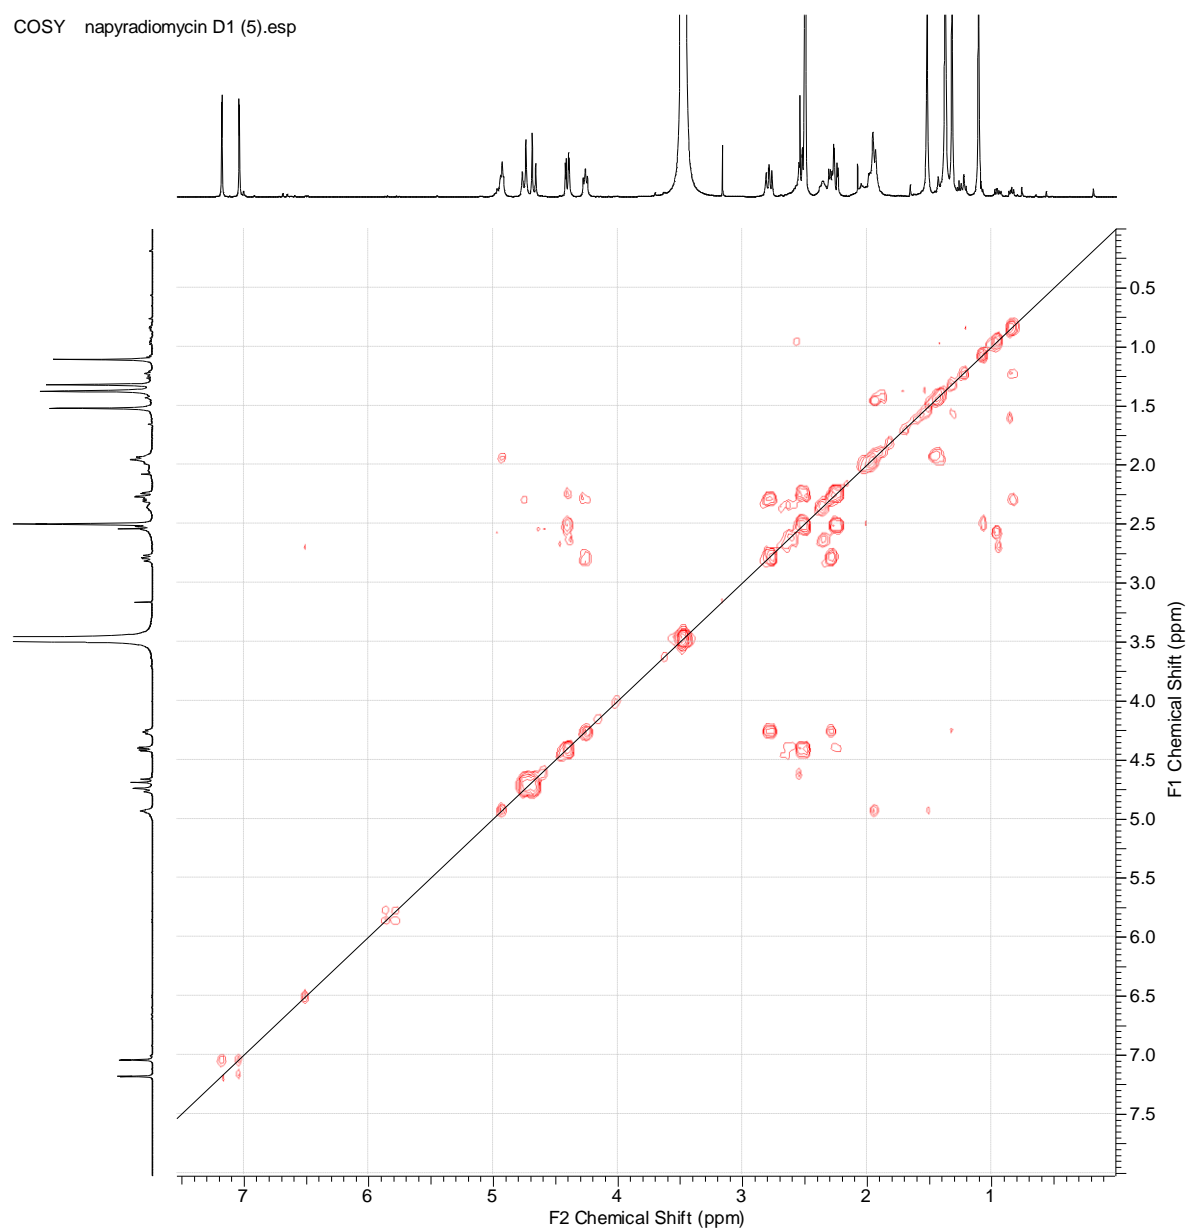

Figure S38. COSY of compound 5.

HSQC napyradiomycin D1 (5).esp

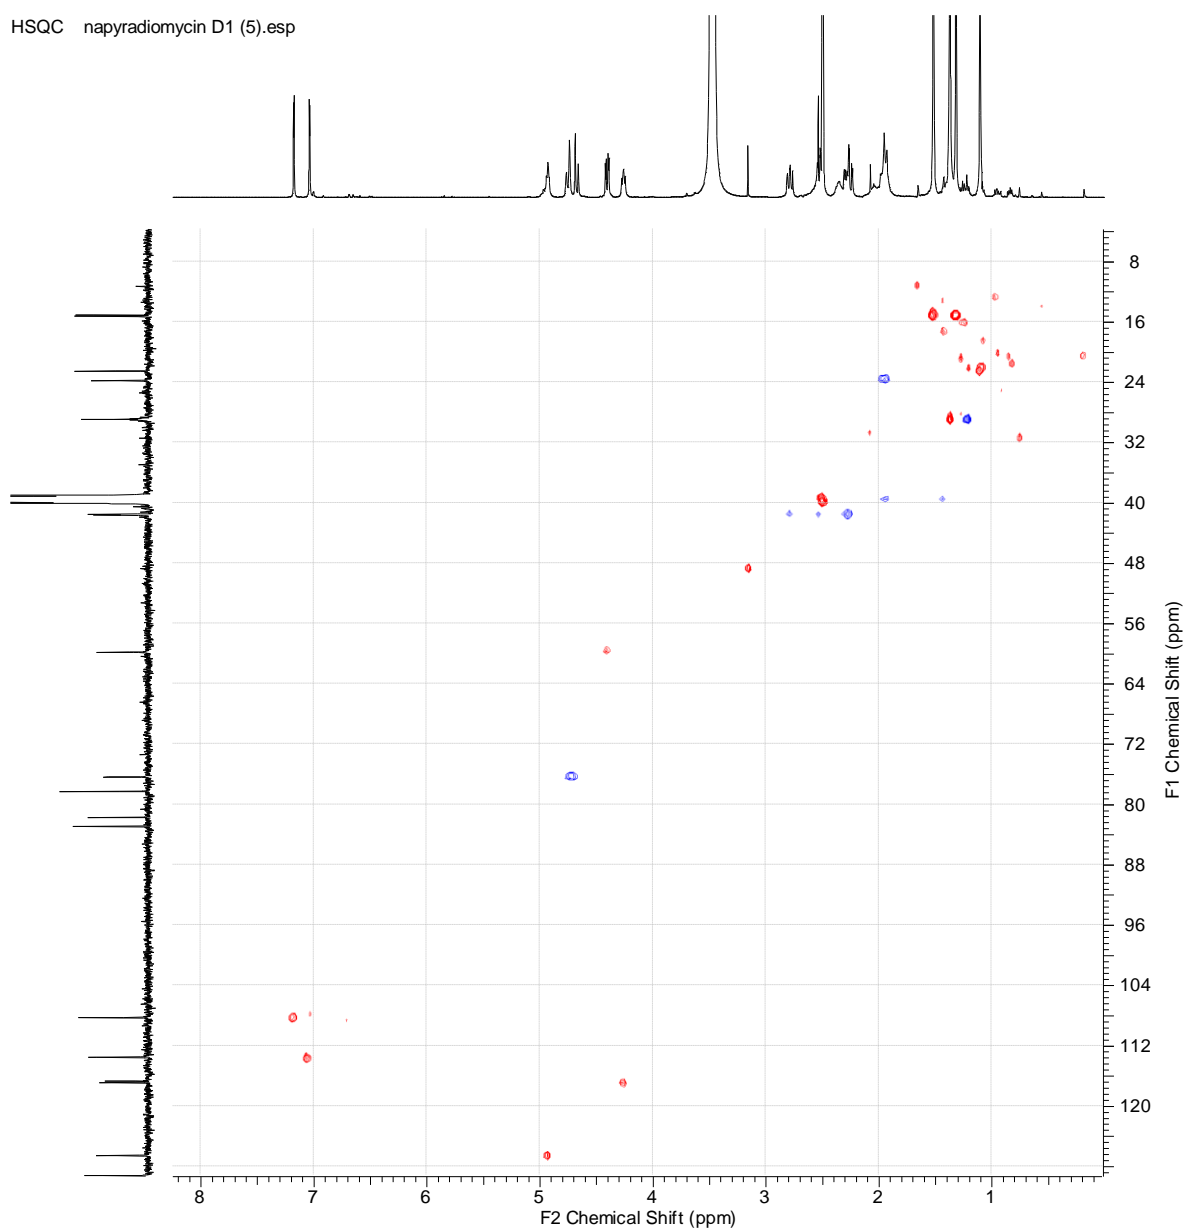

Figure S39. HSQC spectrum of compound 5.

HMBC napyradiomycin D1 (5).esp

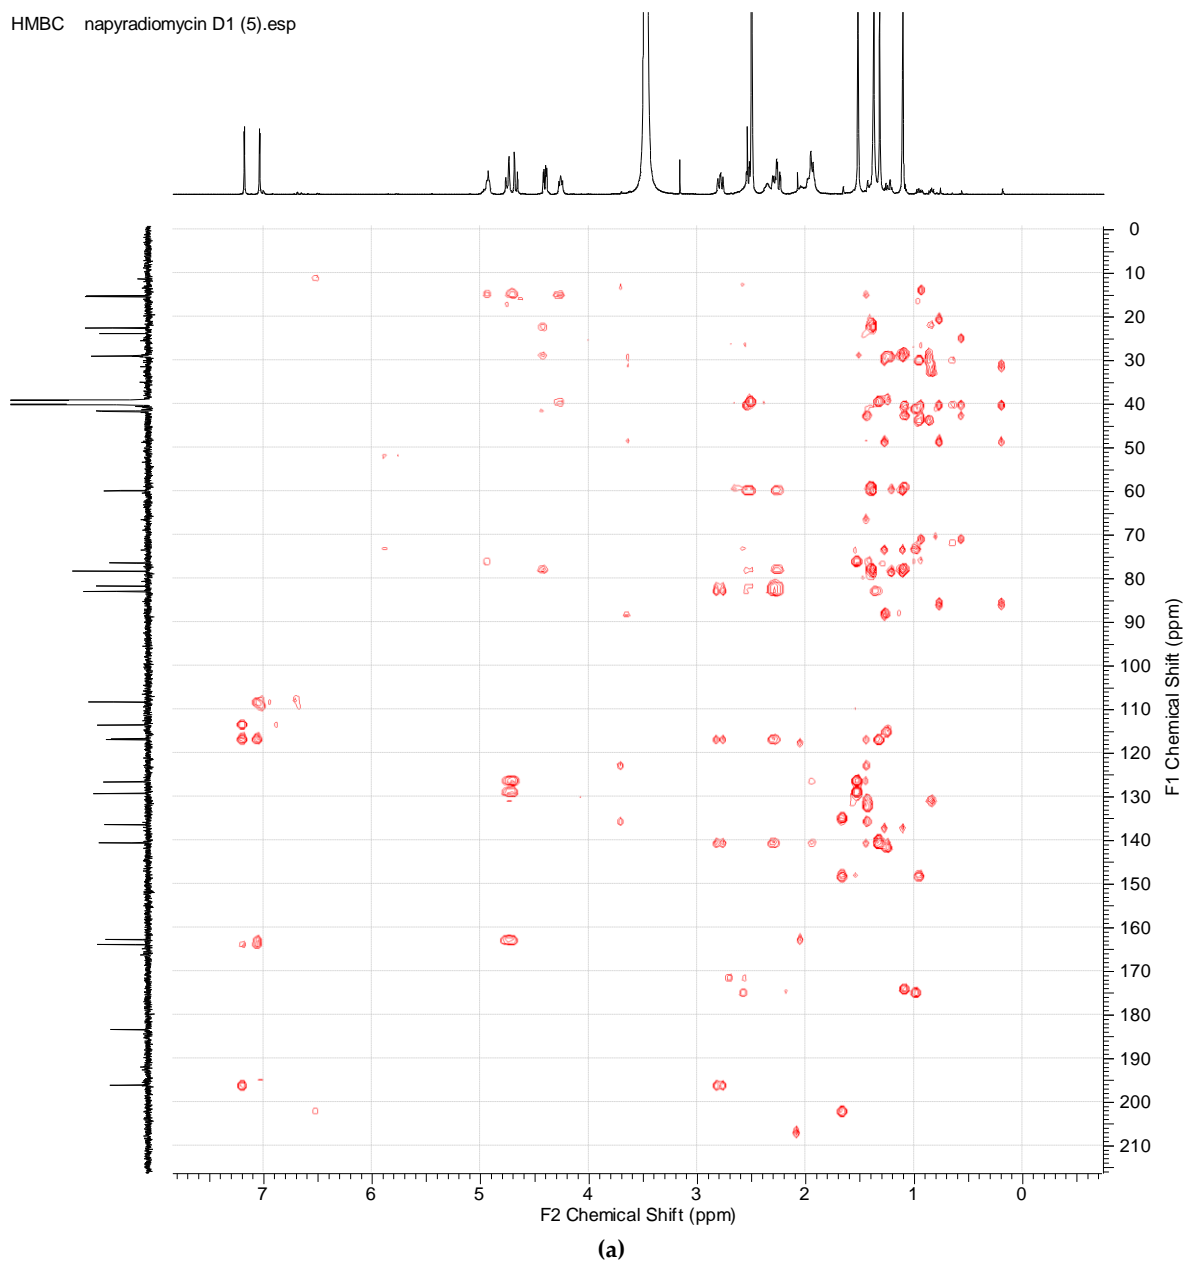

HMBC napyradiomycin D1 (5).esp

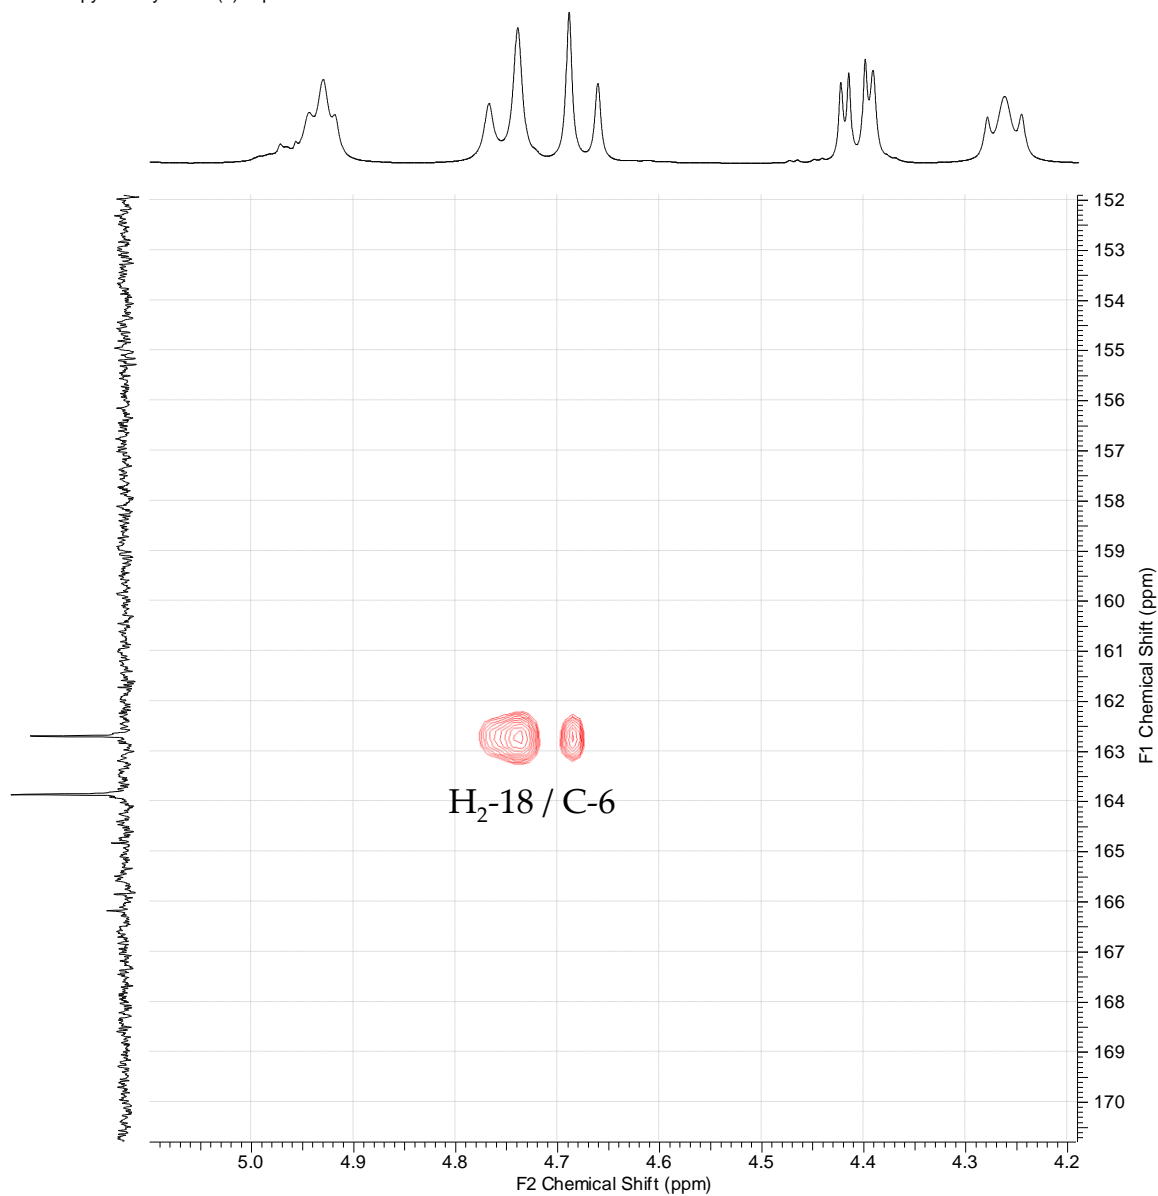

(b)

**Figure S40.** (a) HMBC of compound 5. (b) Key HMBC correlation supporting the the etherification of the 18-hydroxy group in 5.

NOESY napradiomycin D1 (5).esp

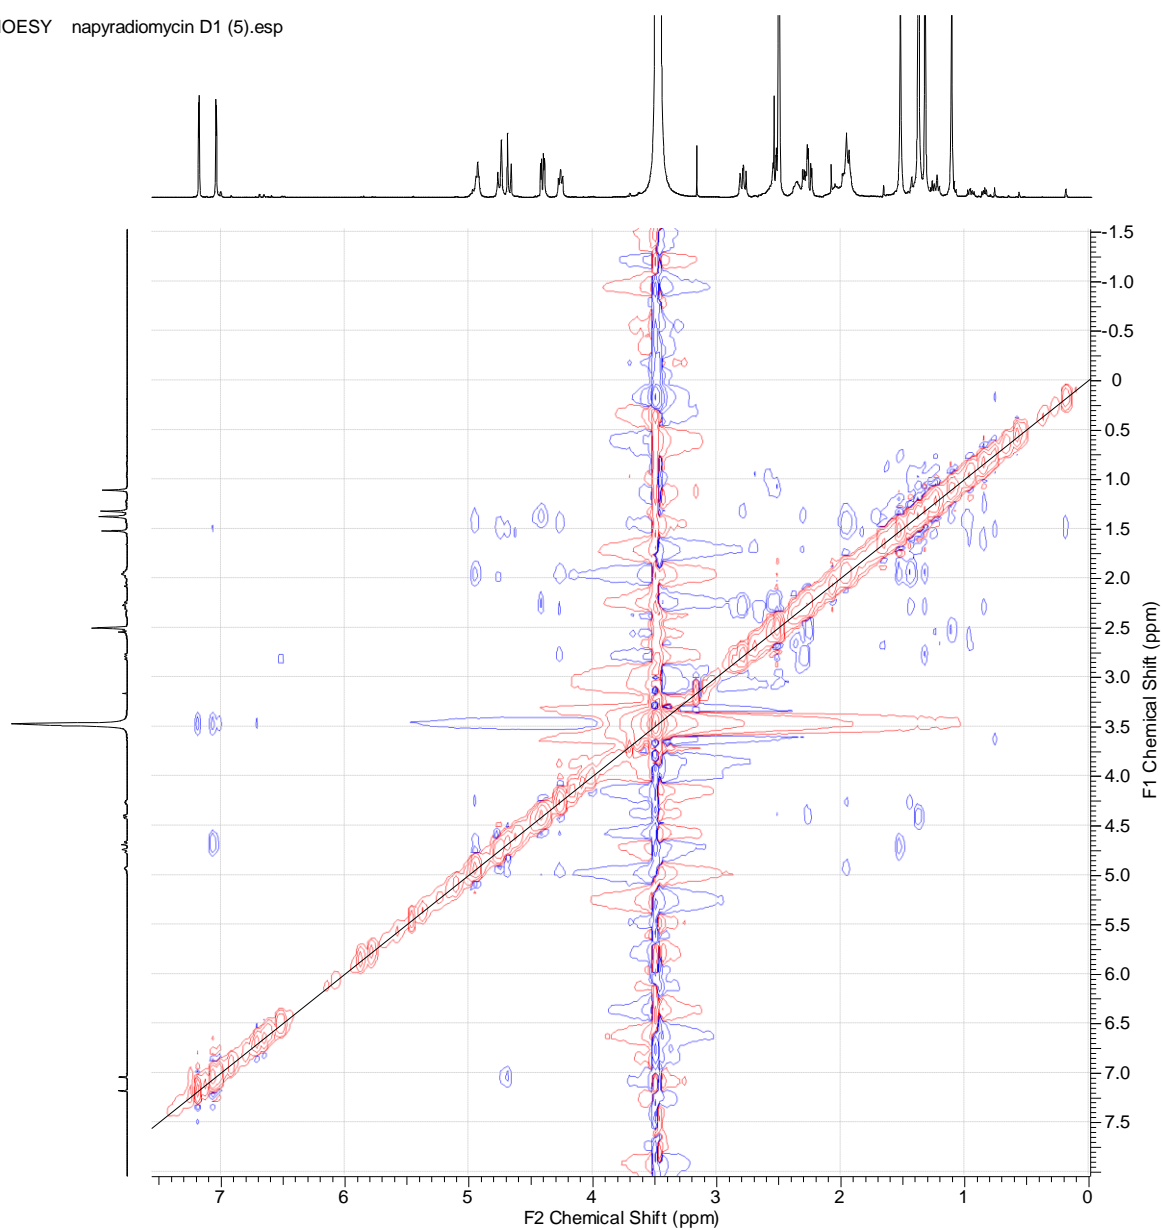

Figure S41. NOESY of compound 5.

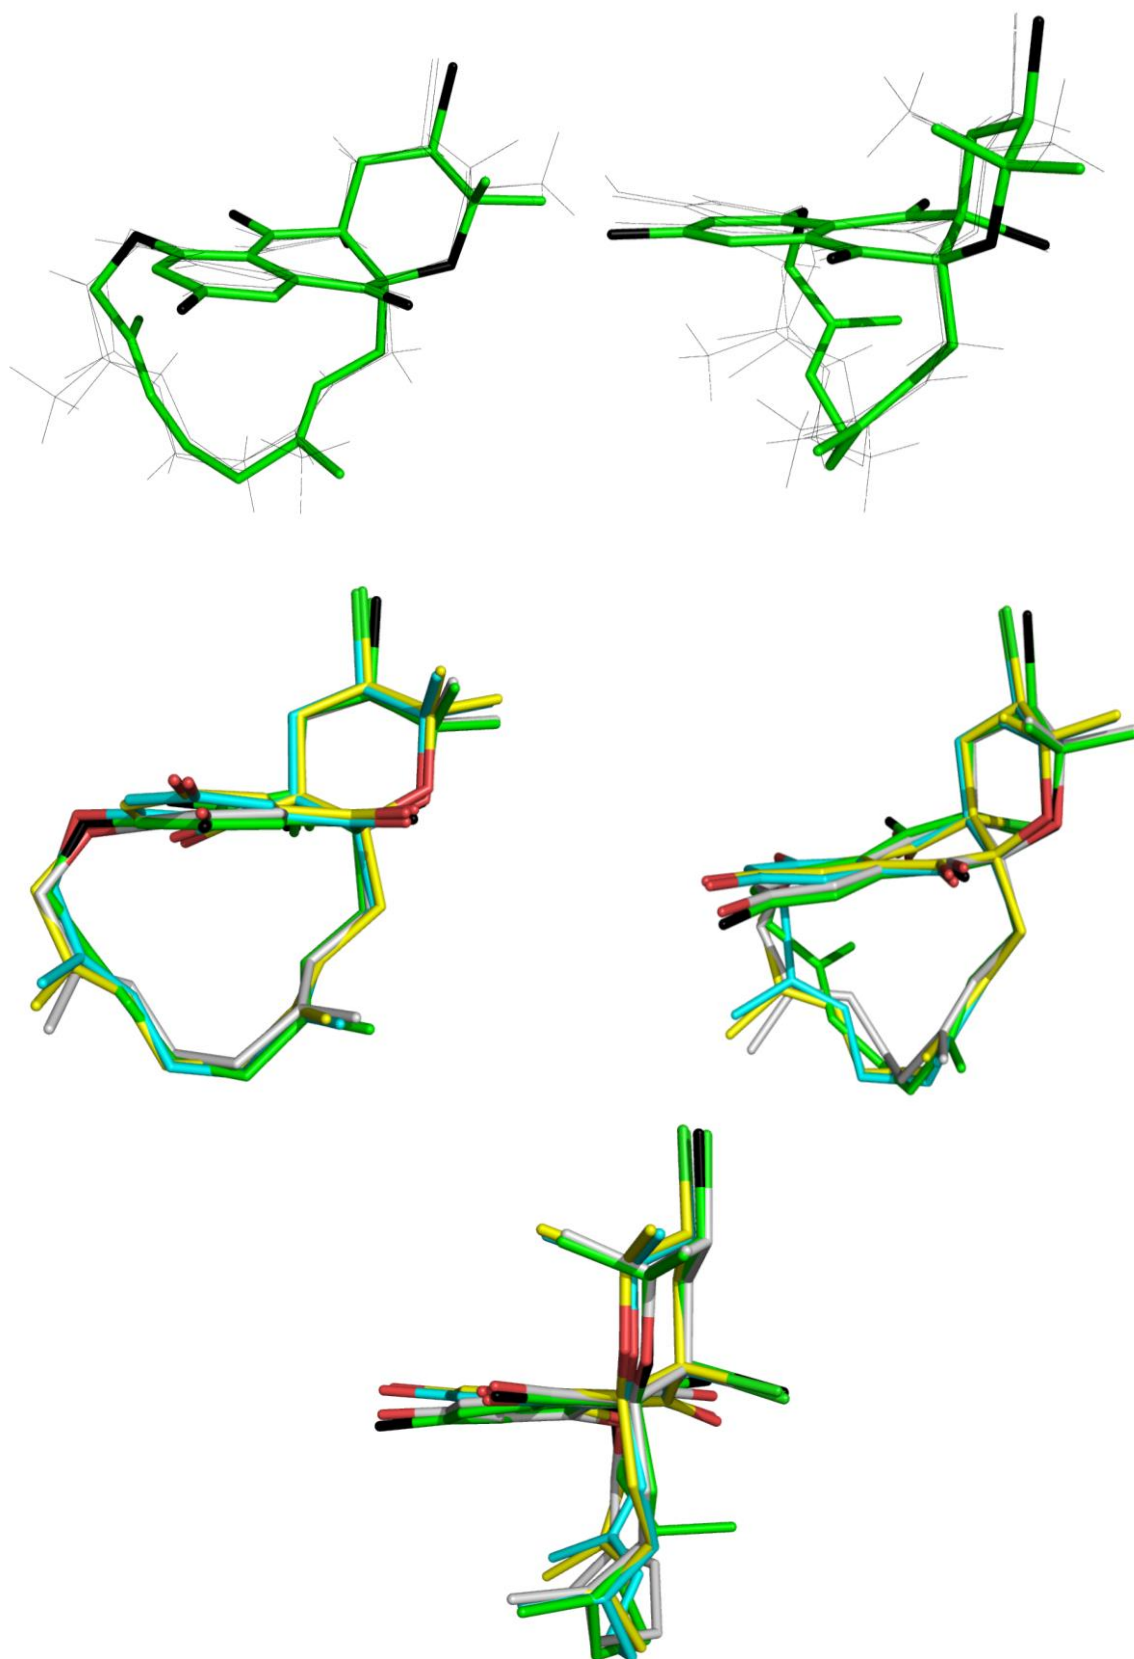

Figure S42. Overlay of different conformers for compound 5.



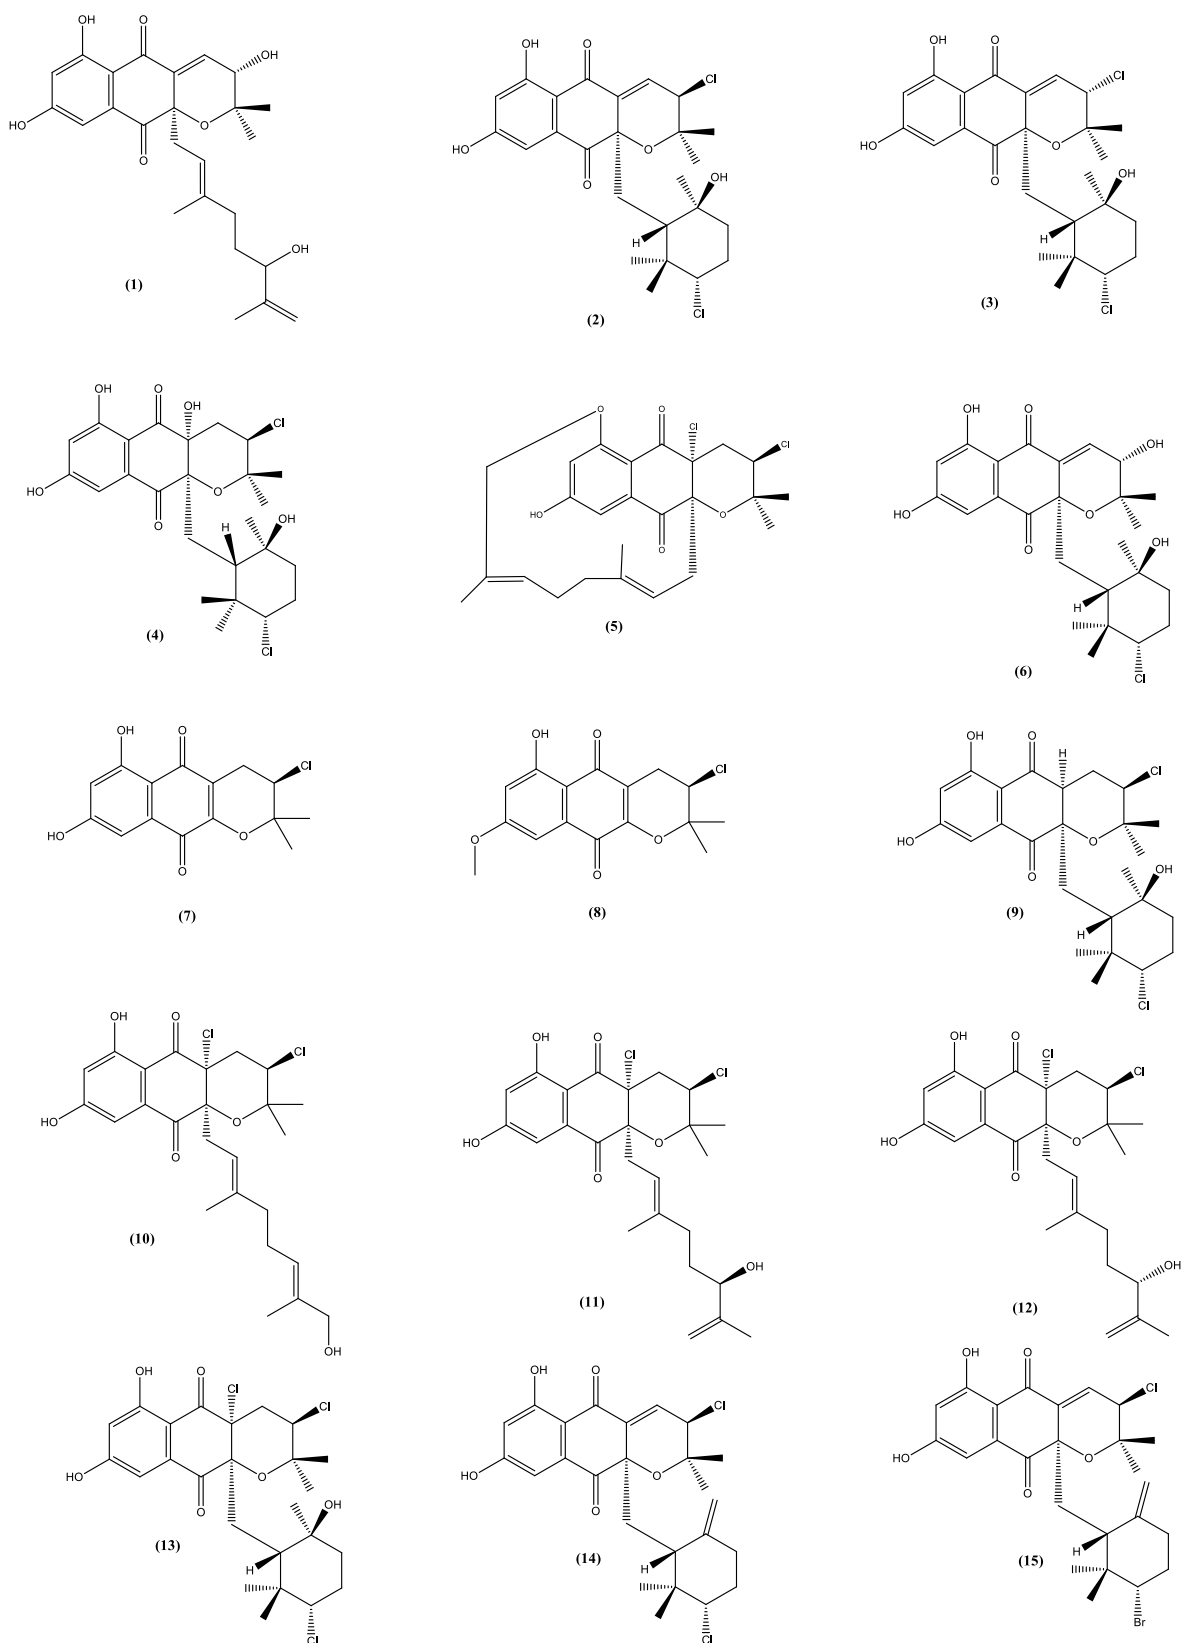

Figure S43. Napyradiomycins metabolites isolated from CA-271078 (1-15)
